# Supplementary material
Source: PubMed Central journal article supplement (PMC6408896)
Supplement: rspb20182672supp2.pdf [file rspb20182672supp2.pdf]

# The evolution of traits and functions in herbivorous coral reef fishes through space and time

Alexandre C. Siqueira<sup>1\*</sup>; David R. Bellwood<sup>1,2</sup>; Peter F. Cowman<sup>1</sup>

<sup>1</sup> ARC Centre of Excellence for Coral Reef Studies, James Cook University, Townsville, QLD 4811, Australia.

<sup>2</sup> College of Science and Engineering, James Cook University, Townsville, QLD 4811, Australia.

\* Author for Correspondence: Alexandre C. Siqueira, alexandre.siqueira@jcu.edu.au

Proceedings of the Royal Society B: Biological Sciences - DOI: 10.1098/rspb.2018.2672

## Supplementary figures

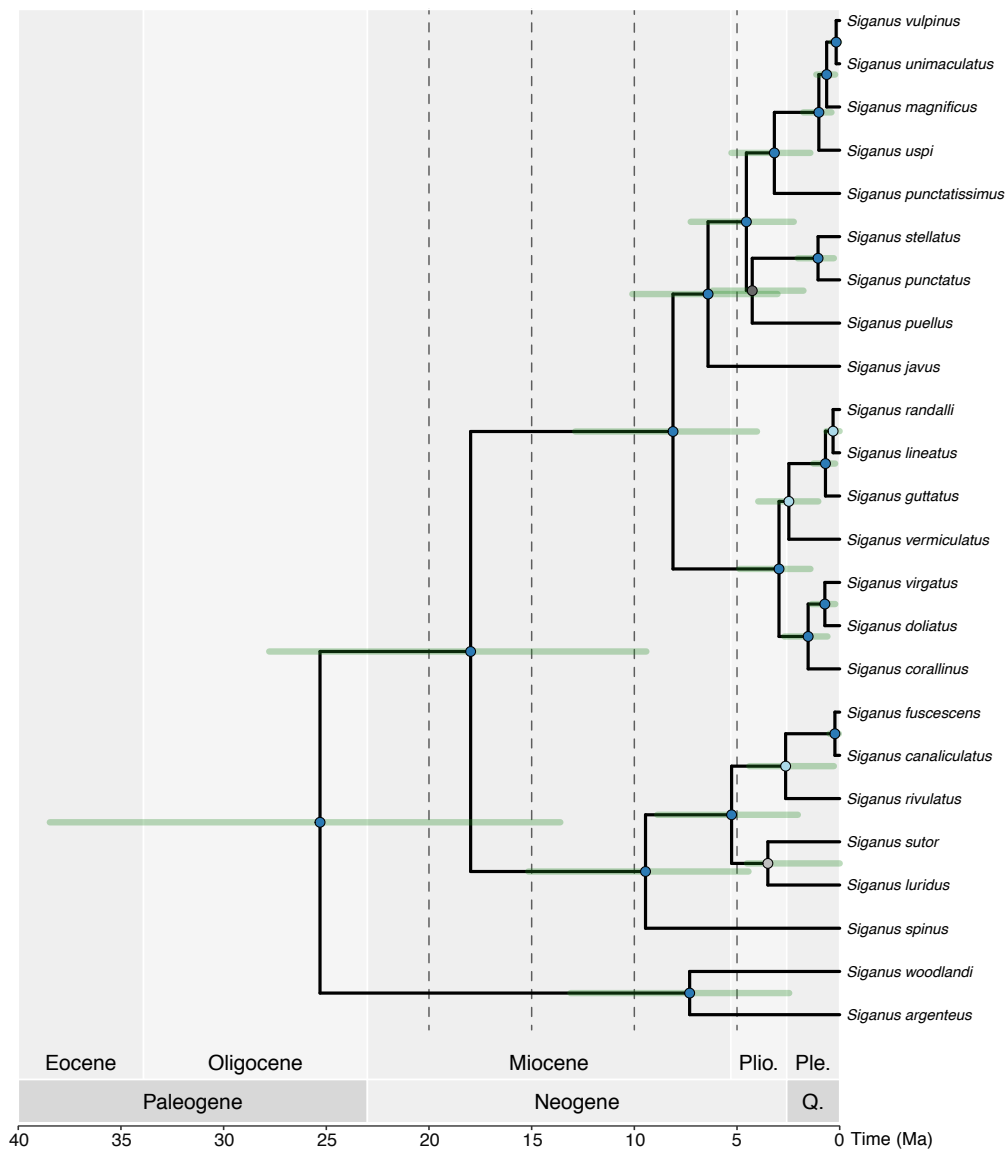

**Supplementary figure 1.** Maximum Clade Credibility (MCC) tree resulting from the Bayesian Inferences for Siganidae. Node colours represent posterior support values:  $\geq 0.9$  (dark blue);  $< 0.9 - \geq 0.7$  (light blue);  $< 0.7 - \geq 0.5$  (light grey);  $\leq 0.5$  (dark grey). Highest Posterior Density intervals for node ages are shown in green. Dashed lines represent the time-slices used to retrieve ancestral states.

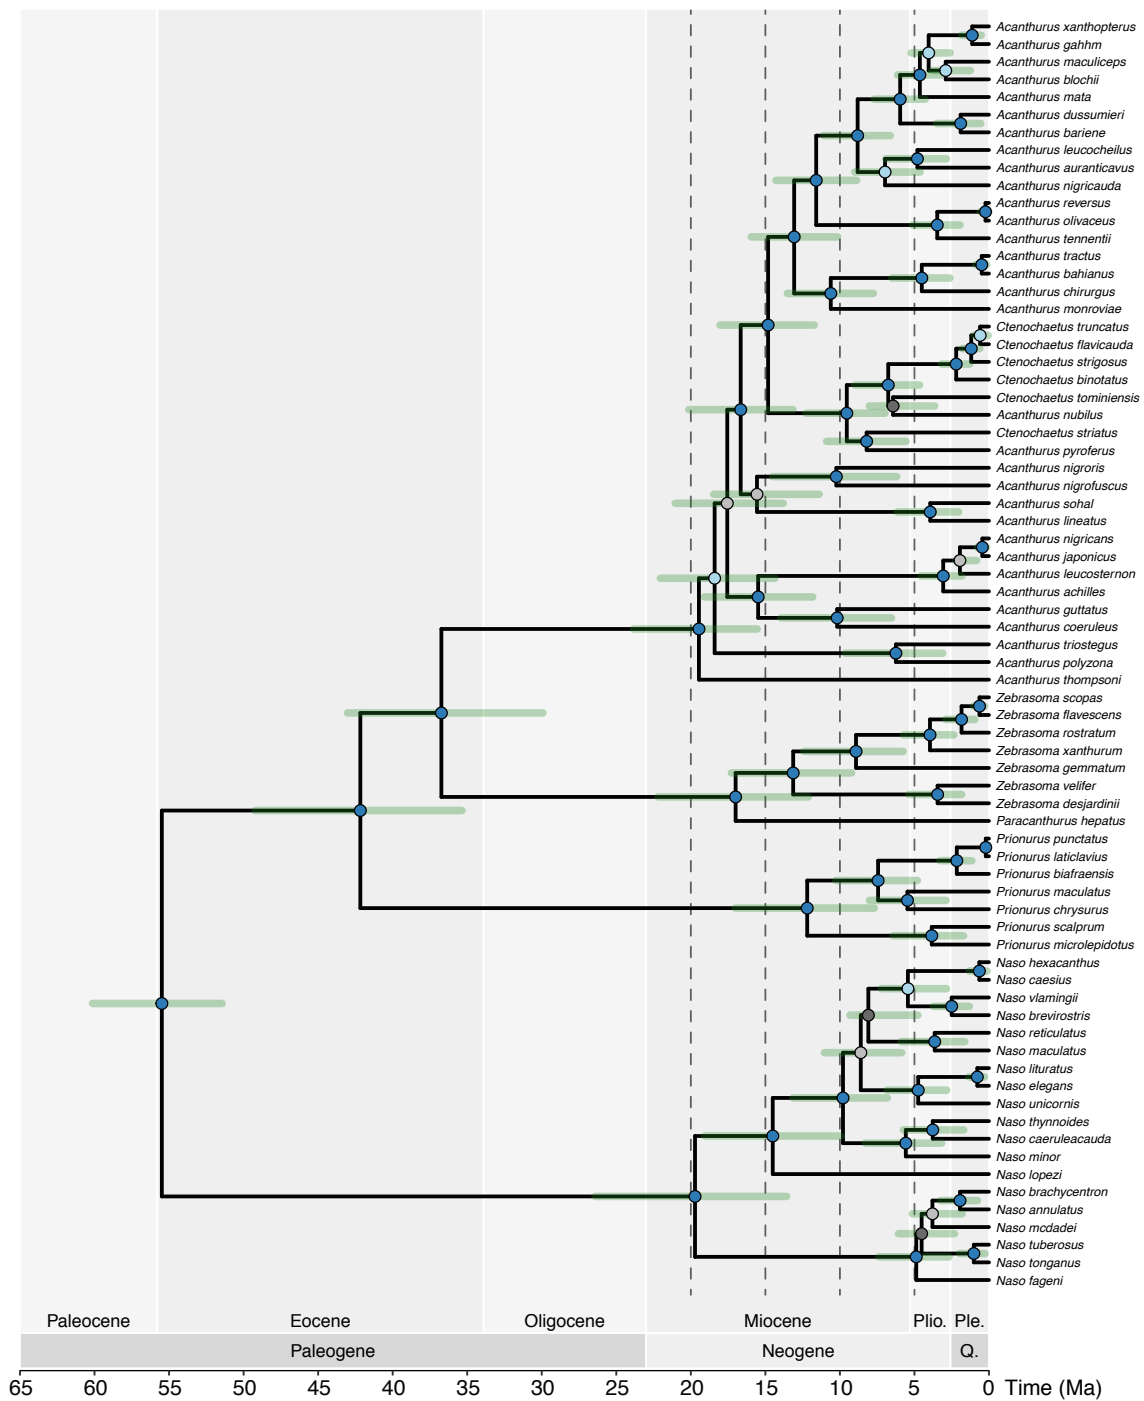

**Supplementary figure 2.** Maximum Clade Credibility (MCC) tree resulting from the Bayesian Inferences for Acanthuridae. Node colours represent posterior support values:  $\geq 0.9$  (dark blue);  $< 0.9 - \geq 0.7$  (light blue);  $< 0.7 - \geq 0.5$  (light grey);  $\leq 0.5$  (dark grey). Highest Posterior Density intervals for node ages are shown in green. Dashed lines represent the time-slices used to retrieve ancestral states.

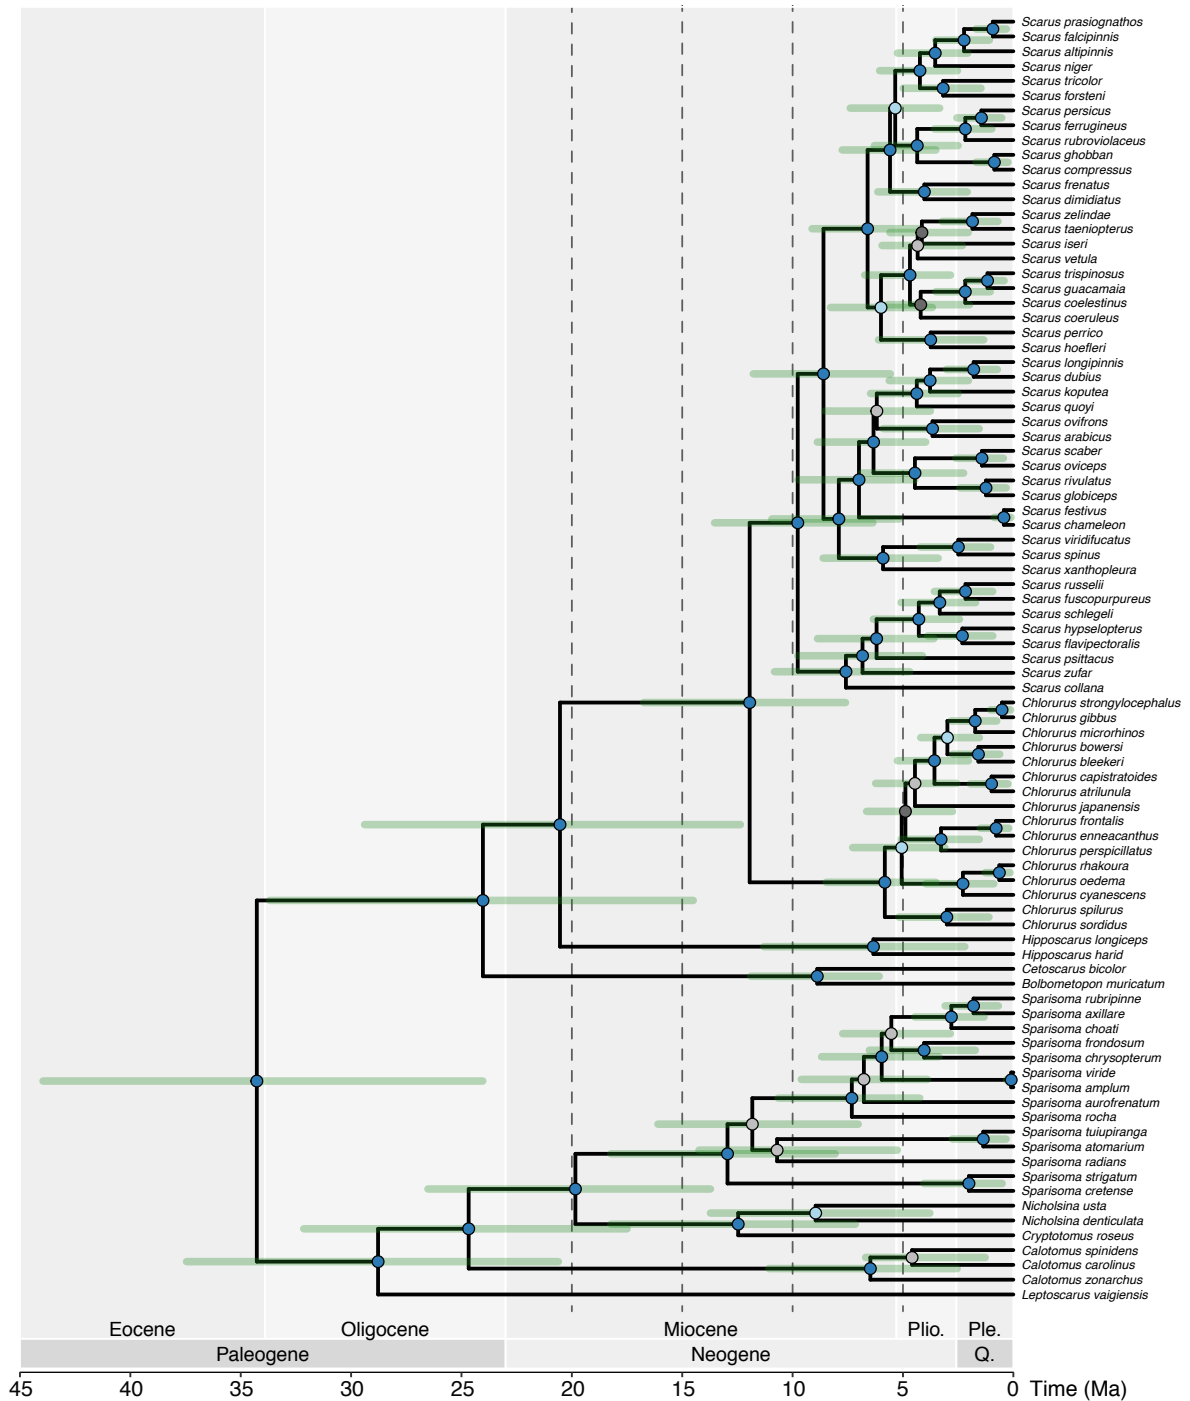

**Supplementary figure 3.** Maximum Clade Credibility (MCC) tree resulting from the Bayesian Inferences for Scarini. Node colours represent posterior support values:  $\geq 0.9$  (dark blue);  $< 0.9 - \geq 0.7$  (light blue);  $< 0.7 - \geq 0.5$  (light grey);  $\leq 0.5$  (dark grey). Highest Posterior Density intervals for node ages are shown in green. Dashed lines represent the time-slices used to retrieve ancestral states.

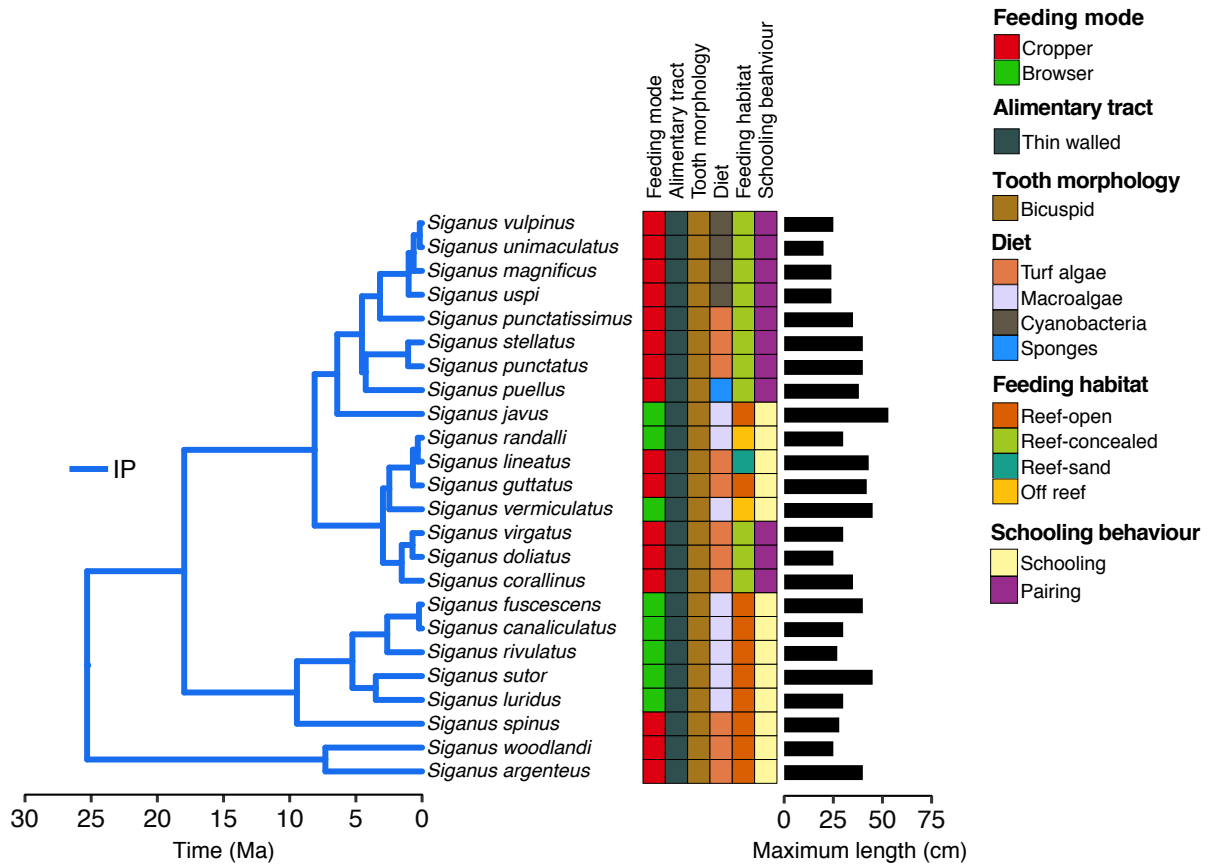

**Supplementary figure 4.** Trait state distribution for Siganidae species ordered according the phylogeny. Branches are coloured according the results from the best ancestral range reconstruction model for the group (DEC; Supplementary table 1), from which we split between areas present in the Indo-Pacific (IP) and Atlantic (Atl).

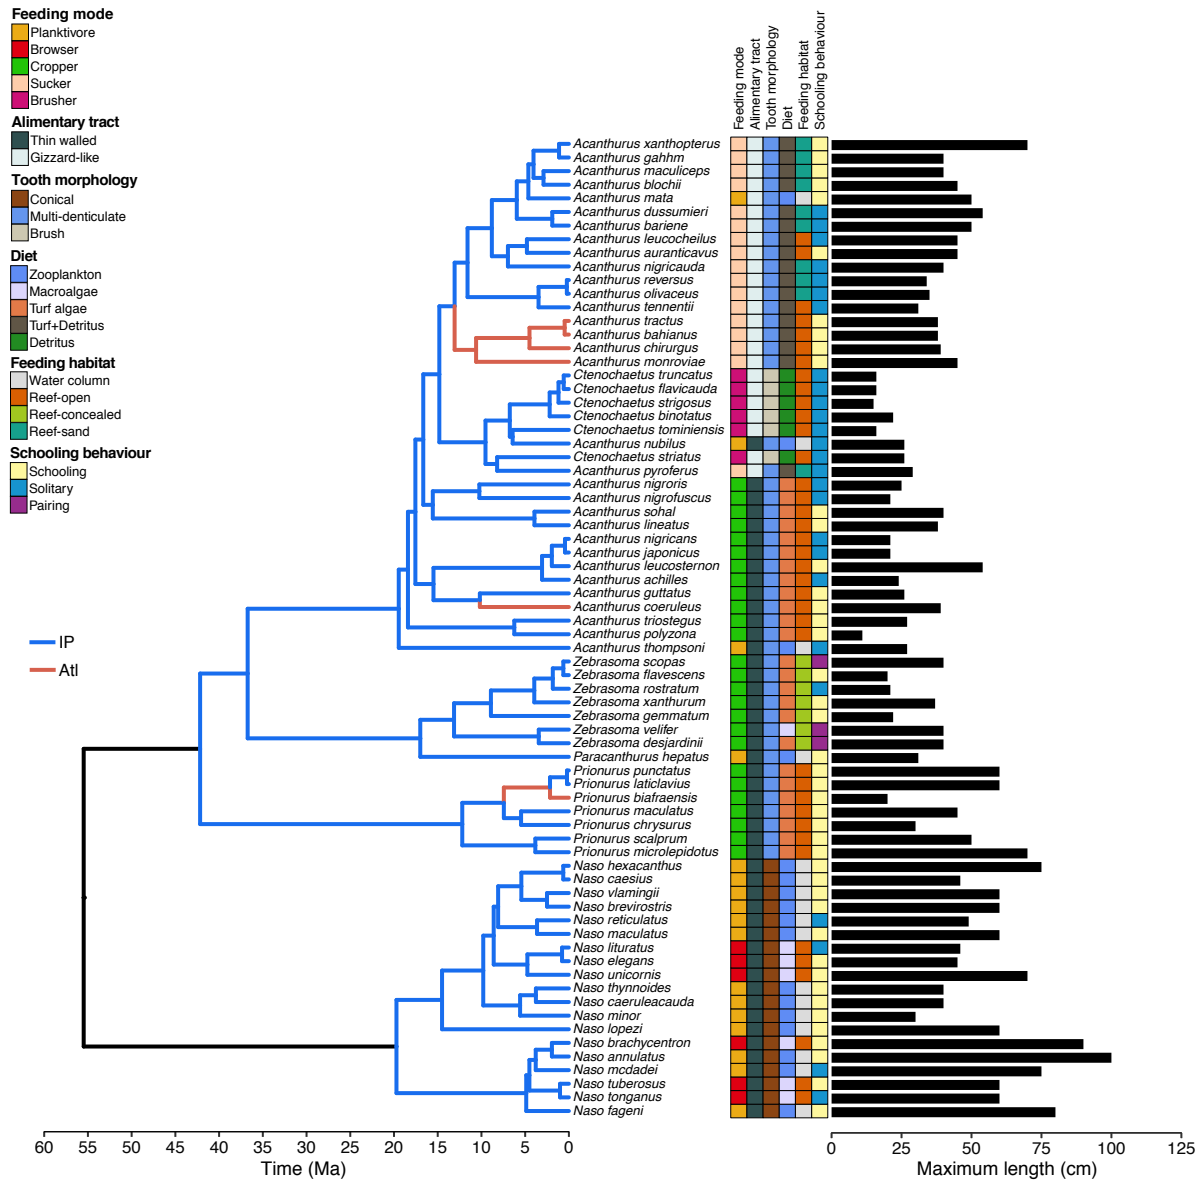

**Supplementary figure 5.** Trait state distribution for Acanthuridae species ordered according the phylogeny. Branches are coloured according the results from the best ancestral range reconstruction model for the group (BAYAREALIKE+J+W; Supplementary table 2), from which we split between areas present in the Indo-Pacific (IP) and Atlantic (Atl). Black branches represent ancestral lineages that were likely restricted to the Tethyan marine biodiversity hotspot (see Supplementary methods).

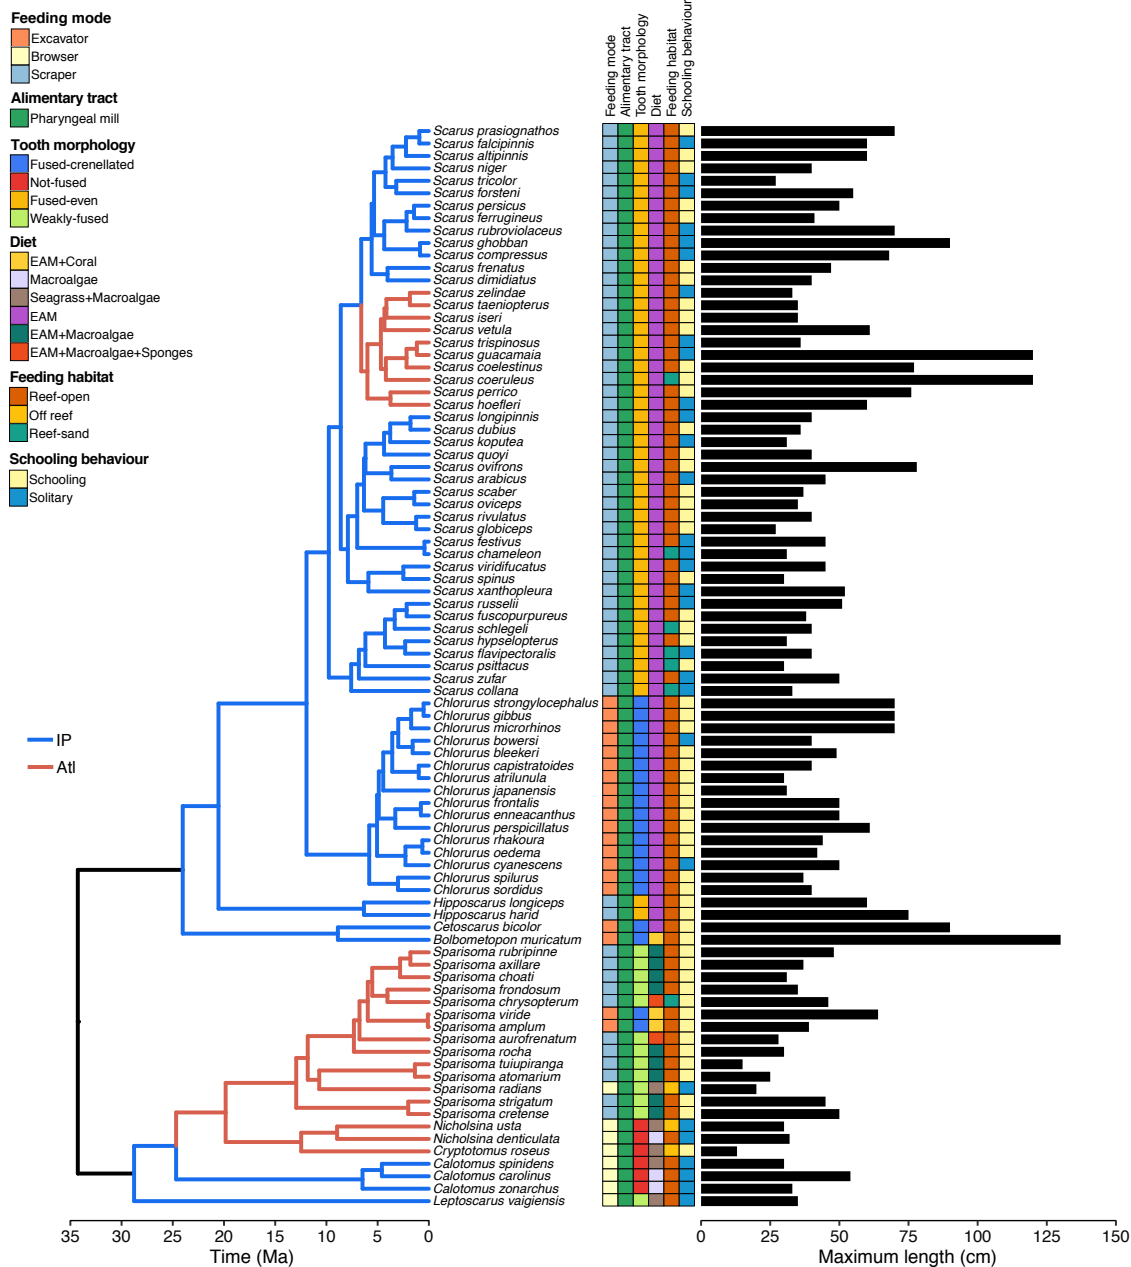

**Supplementary figure 6.** Trait state distribution for Scarini species ordered according the phylogeny. Branches are coloured according the results from the best ancestral range reconstruction model for the group (DEC+J+W; Supplementary table 3), from which we split between areas present in the Indo-Pacific (IP) and Atlantic (Atl). Black branches represent ancestral lineages that were likely restricted to the Tethyan marine biodiversity hotspot (see Supplementary methods).

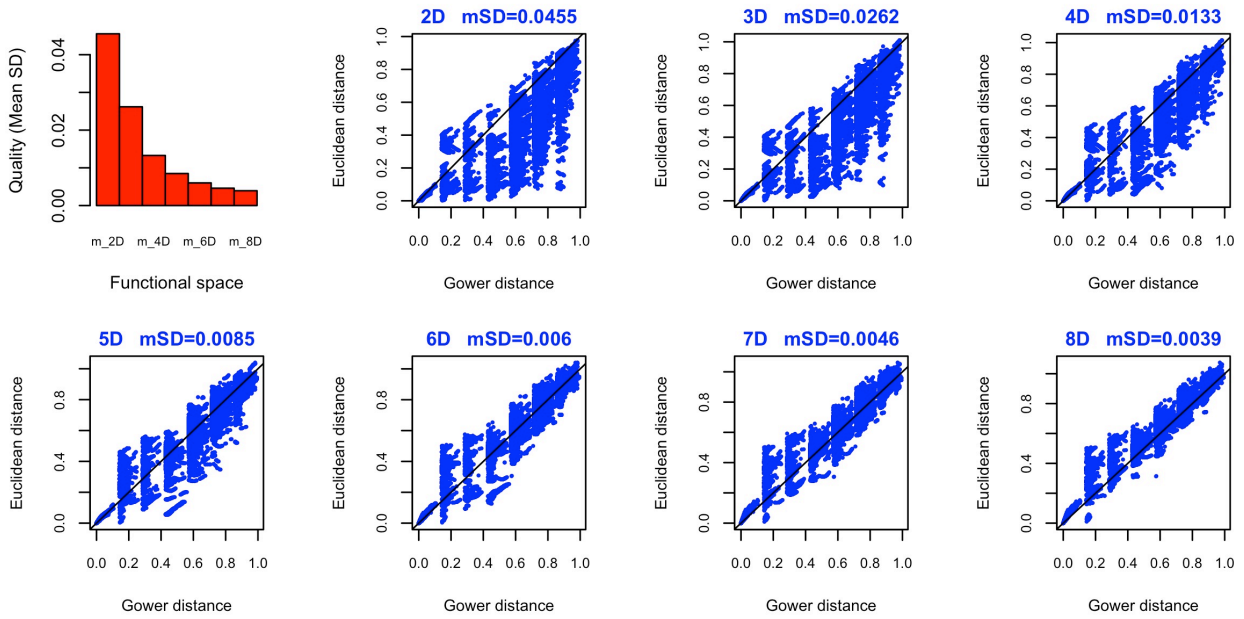

**Supplementary figure 7.** Quality of representation of the multidimensional space for trait combinations in surgeonfishes, parrotfishes and rabbitfishes. Output from the ‘*quality\_funct\_space*’ R function, showing an increase in quality (lower mSD values) with concomitant increase in the number of axes.

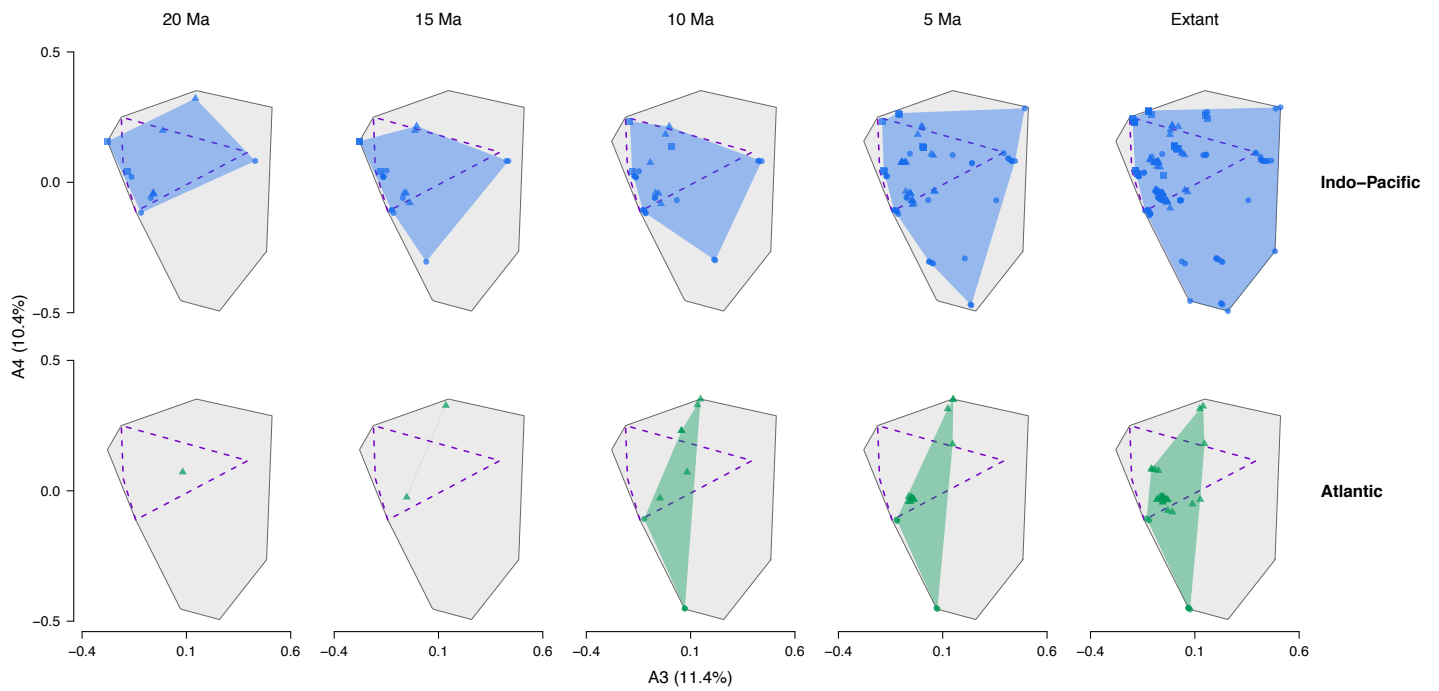

**Supplementary figure 8.** Multidimensional trait space occupied by surgeonfish (circles), rabbitfish (squares) and parrotfish (triangles) lineages in two biogeographic regions through time. Plots show the third and fourth axes (A3-A4) derived from a principal coordinate analysis (PCoA) performed on seven traits related to feeding. Each column represents a time-slice (20-5 Ma) in which we assessed the traits through ancestral reconstructions. The Extant column represents trait space of extant species. Background grey area shows the total space occupied combining fossils, time-slices and extant species. Convex hulls represent space occupied by Atlantic (green), Indo-Pacific (blue) and Tethys (50 Ma; purple dashed line) lineages. Symbols represent lineages present in each point in time.



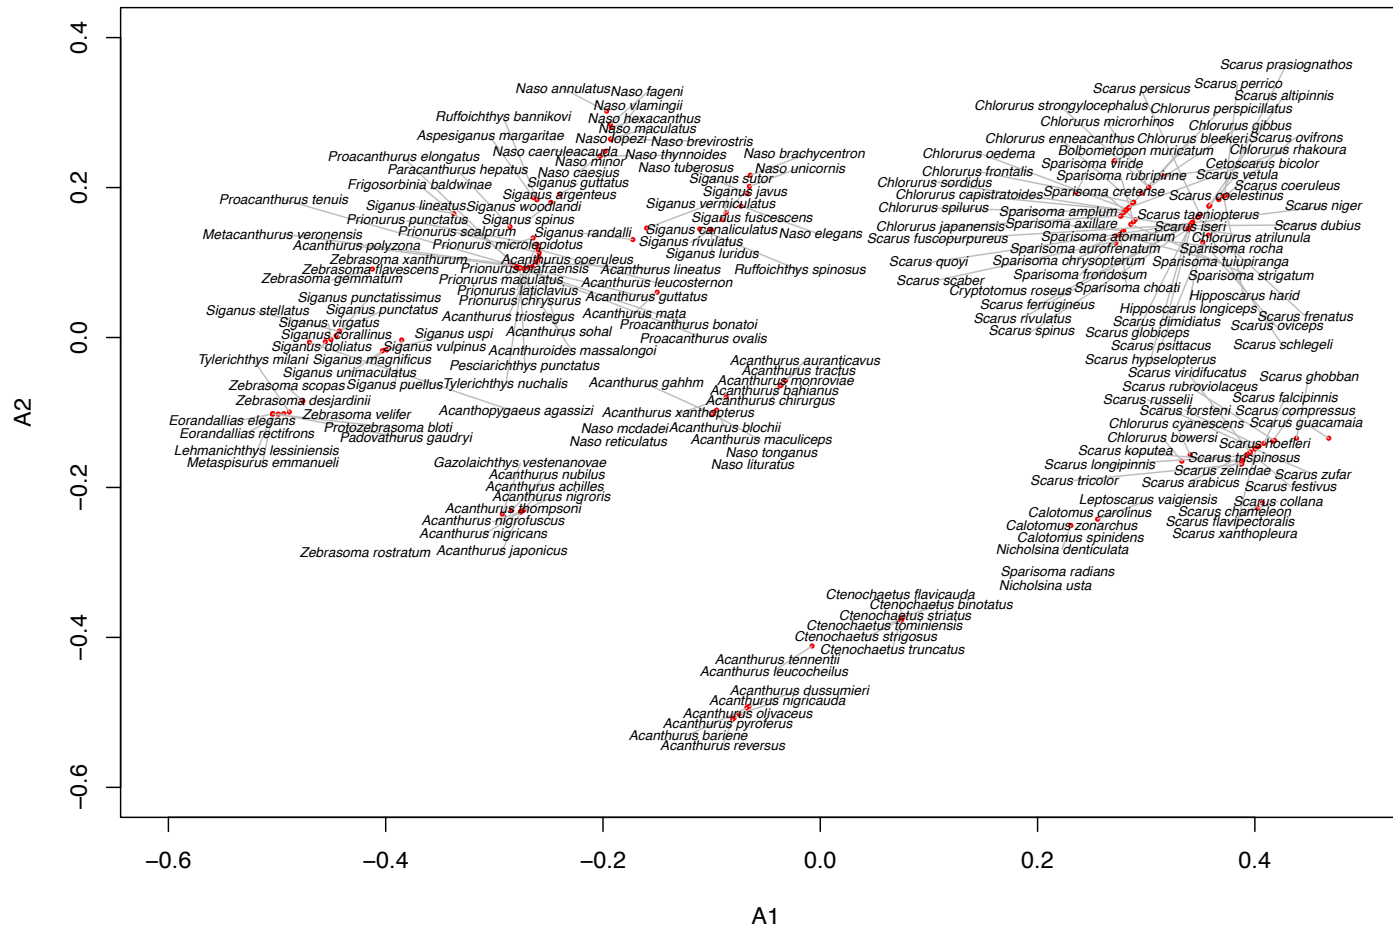

**Supplementary figure 9.** Species' positions in multidimensional space for axes 1 and 2 derived from the PCoA performed on seven traits related to feeding of extant surgeonfishes, rabbitfishes and parrotfishes present in the phylogenies, and known herbivorous fish fossils from Monte Bolca.

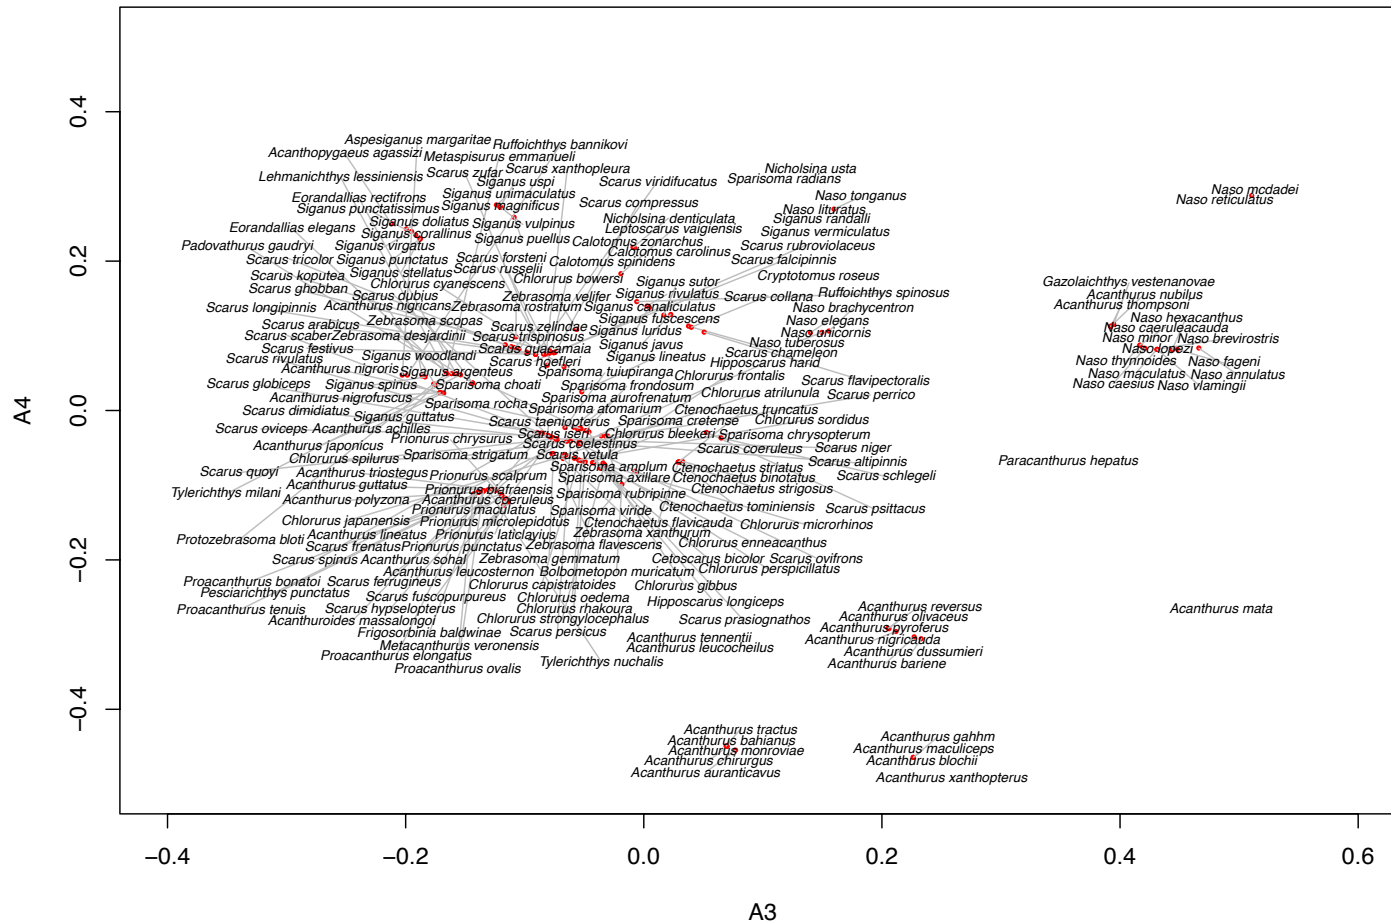

**Supplementary figure 10.** Species' positions in multidimensional space for axes 3 and 4 derived from the PCoA performed on seven traits related to feeding of extant surgeonfishes, rabbitfishes and parrotfishes present in the phylogenies, and known herbivorous fish fossils from Monte Bolca.

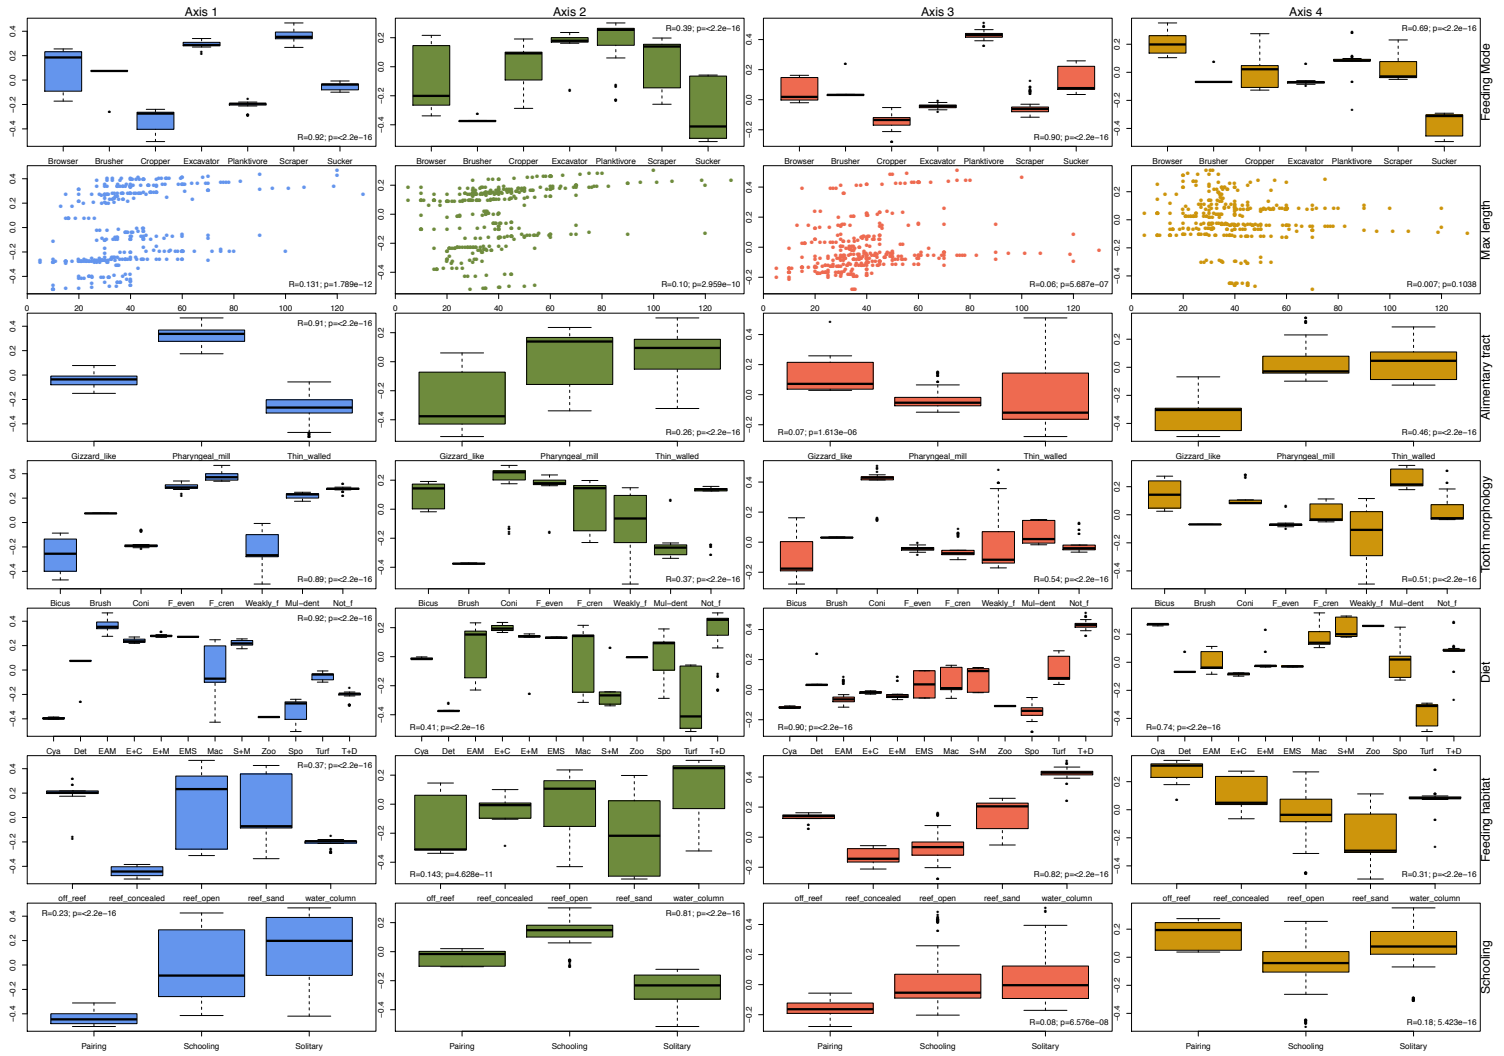

**Supplementary figure 11.** Correlation between PCoA axes and traits categorized for herbivorous fishes, assessed using linear models. The different states in each trait are explained in the Supplementary methods. Abbreviations in Tooth morphology: Bicus - Bicuspid; Coni - Conical; F\_even - Fused-even; F\_cren - Fused-crenelated; Weakly\_f - Weakly fused; Mul-dent - Multi-denticulate; Not\_f - Not fused. Abbreviations in Diet: Cya - Cyanobacteria; Det - Detritus; E+C - EAM + Coral; E+M - EAM + Macroalgae; EMS - EAM + Macroalgae + Sponges; Mac - Macroalgae; S+M - Seagrass + Macroalgae; Zoo - Zooplankton; Spo - Sponges; T+D - Turf + Detritus.



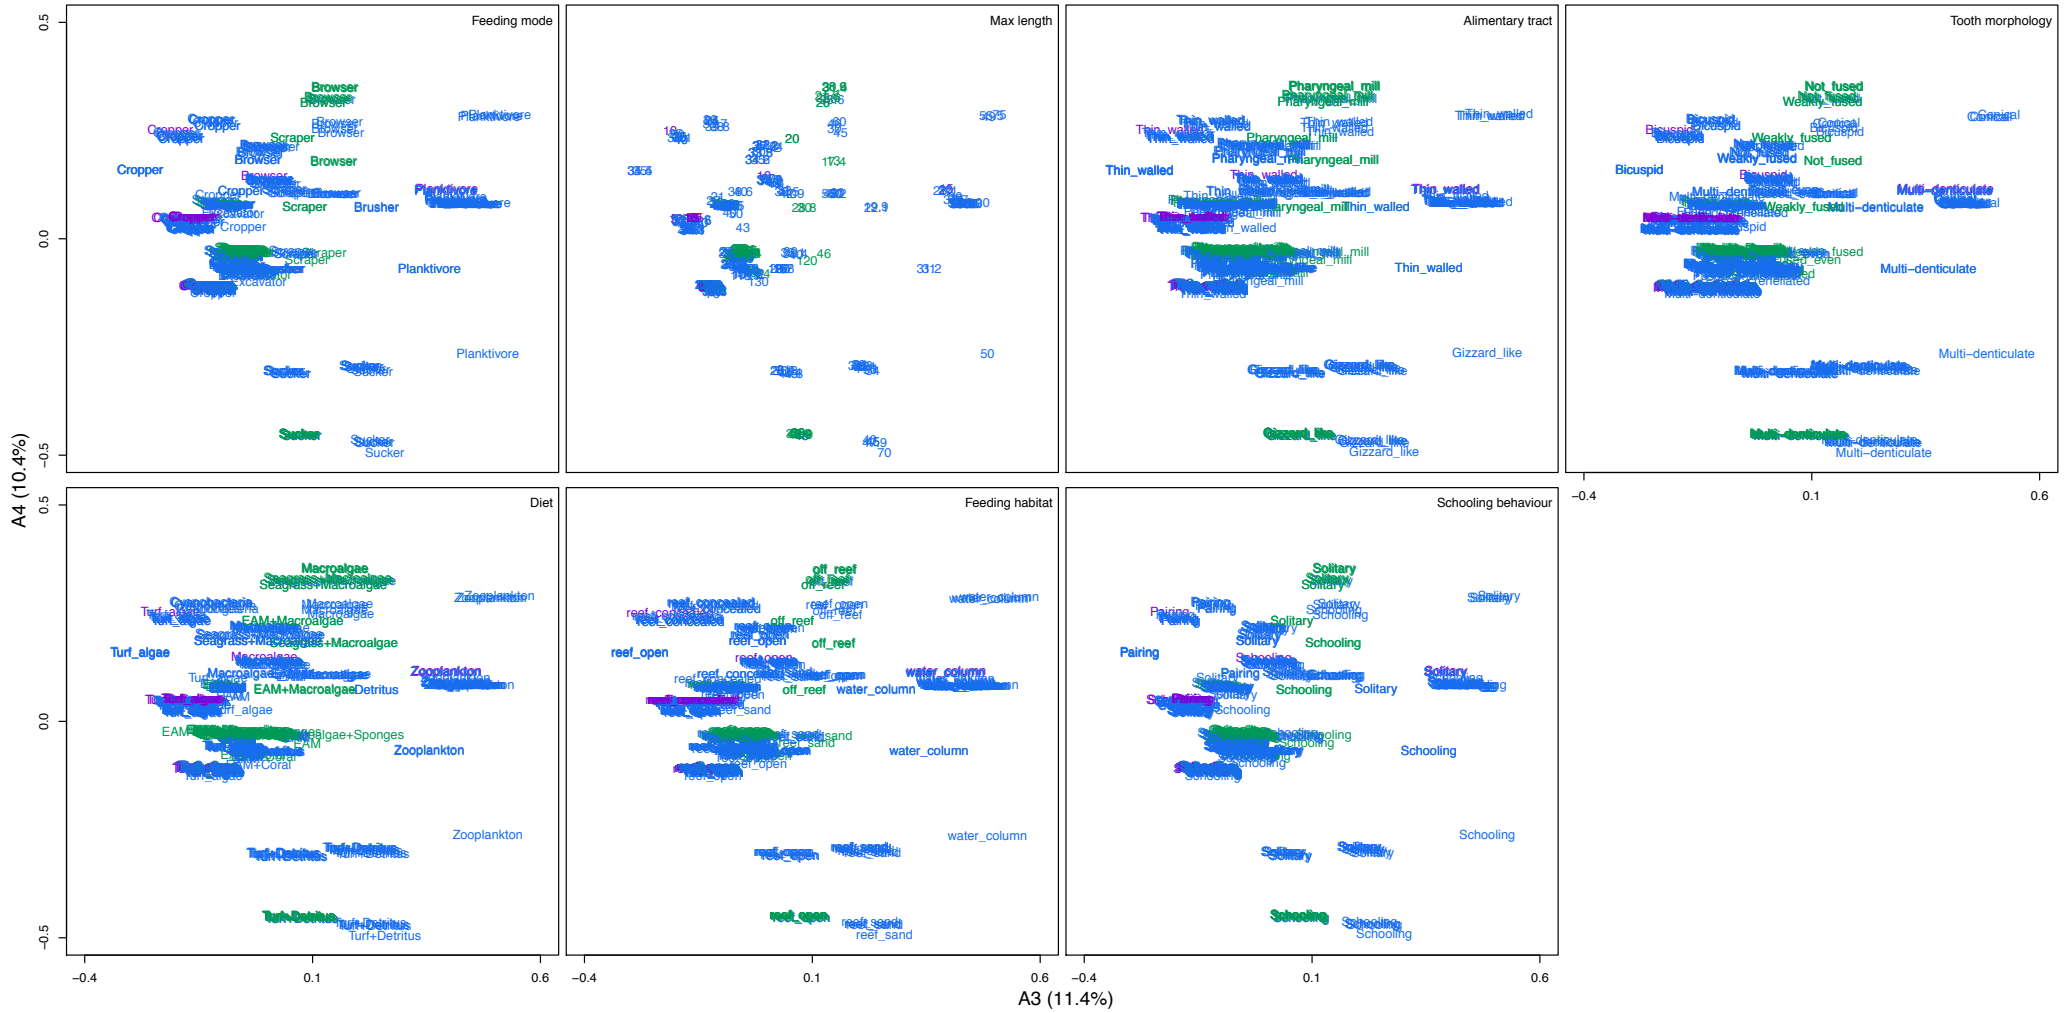

**Supplementary figure 13.** Trait distribution in multidimensional space for axes 3 and 4 derived from the PCoA performed on seven traits related to feeding of extant surgeonfishes, rabbitfishes and parrotfishes present in the phylogenies, and known herbivorous fish fossils from Monte Bolca.

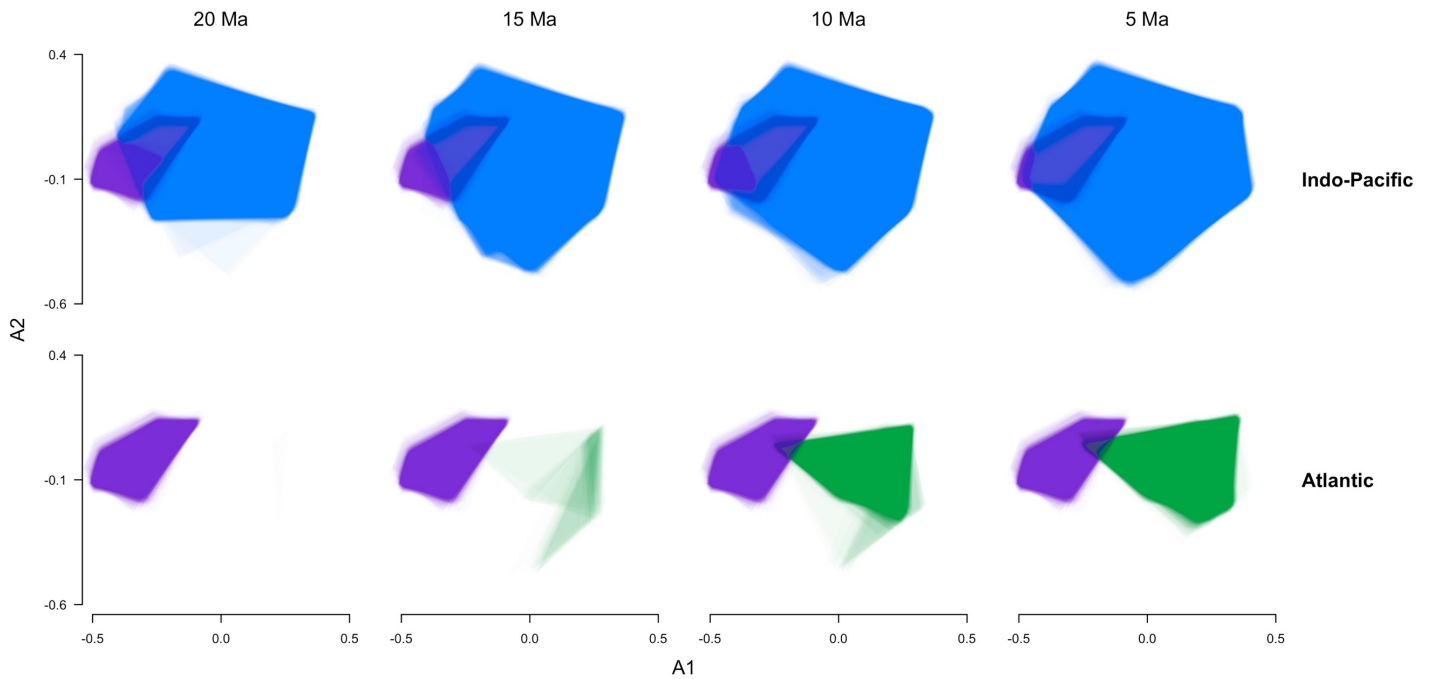

**Supplementary figure 14.** Overlapped convex hulls of 1000 PCoAs performed on seven traits related to feeding of surgeonfishes, rabbitfishes and parrotfishes. Each polygon results from a sample of three phylogenies (one per herbivorous group) from the posterior distribution derived from the Bayesian inferences (see Supplementary methods). Each column represents a time-slice (20-5 Ma) in which we assessed the traits through ancestral reconstructions. Convex hulls represent space occupied by Atlantic (green), Indo-Pacific (blue) and Tethys (50 Ma; purple) lineages.

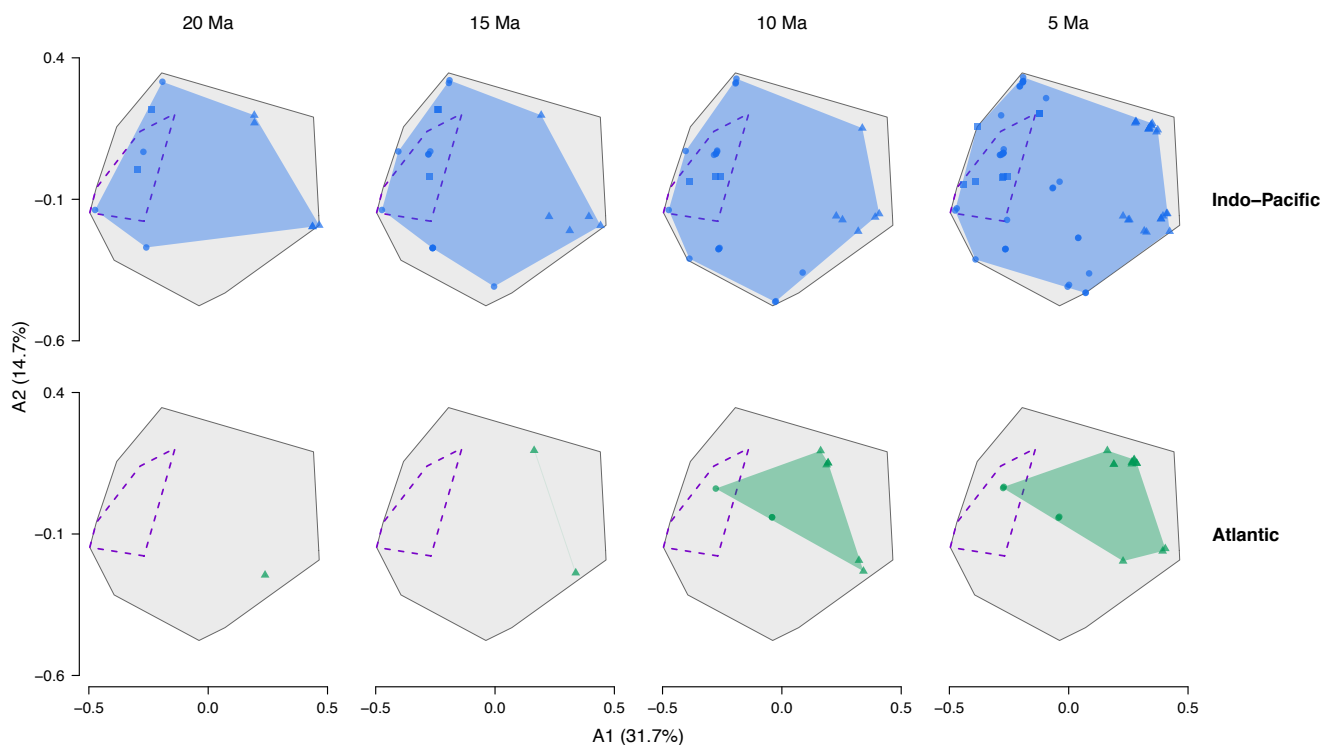

**Supplementary figure 15.** Multidimensional trait space occupied by surgeonfish (circles), rabbitfish (squares) and parrotfish (triangles) lineages in two biogeographic regions through time. Plots show the two first axes (A1-A2) derived from a PCoA performed on seven traits related to feeding. Each column represents a time-slice (20-5 Ma) in which we assessed the traits through ancestral reconstructions. Nodes that had the posterior probability for the highest state below 0.67 were classified with the second most likely state (see Supplementary methods). The Extant column represents trait space of extant species. Background grey area shows the total space occupied combining fossils, time-slices and extant species. Convex hulls represent space occupied by Atlantic (green), Indo-Pacific (blue) and Tethys (50 Ma; purple dashed line) lineages. Symbols represent lineages present in each point in time.

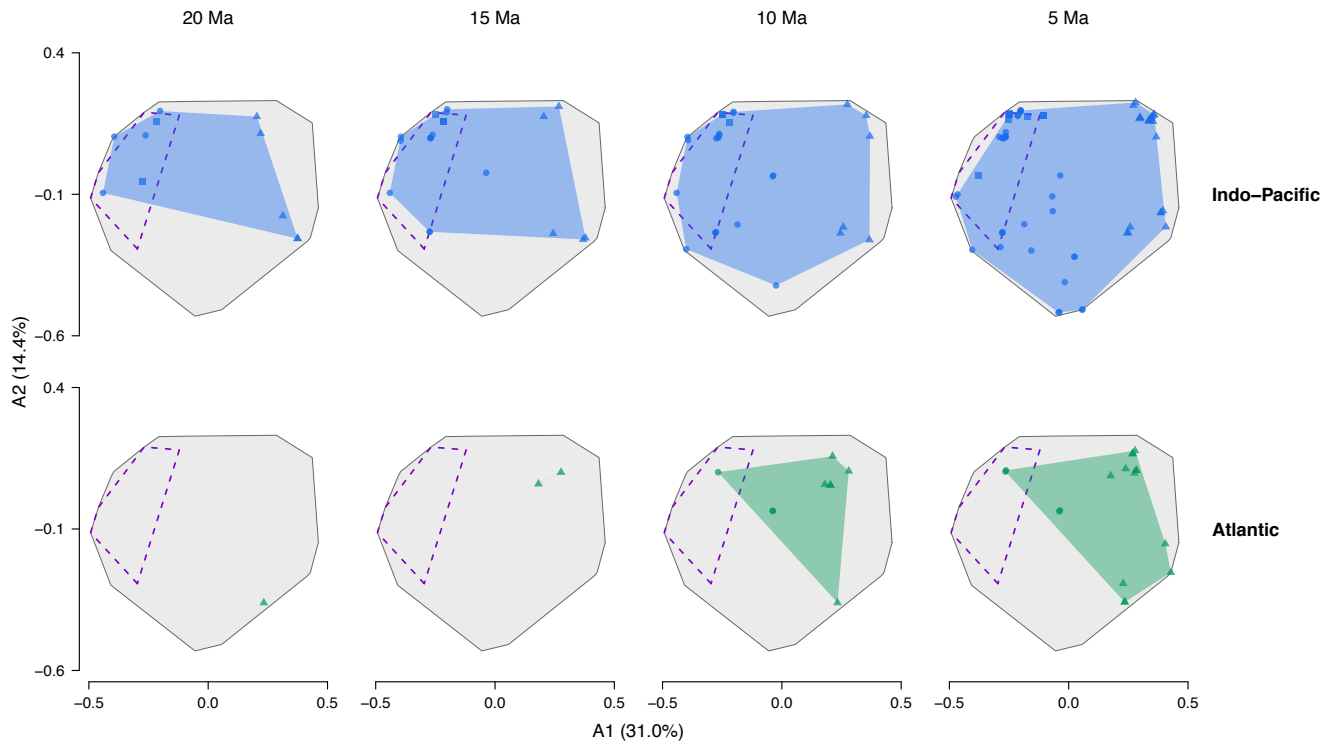

**Supplementary figure 16.** Multidimensional trait space occupied by surgeonfish (circles), rabbitfish (squares) and parrotfish (triangles) lineages in two biogeographic regions through time. Plots show the two first axes (A1-A2) derived from a PCoA performed on seven traits related to feeding. Each column represents a time-slice (20-5 Ma) in which we assessed the traits through ancestral reconstructions. Nodes that had less than 95% of the higher posterior probabilities associated with the best-supported were classified with the second most likely state (see Supplementary methods). The Extant column represents trait space of extant species. Background grey area shows the total space occupied combining fossils, time-slices and extant species. Convex hulls represent space occupied by Atlantic (green), Indo-Pacific (blue) and Tethys (50 Ma; purple dashed line) lineages. Symbols represent lineages present in each point in time.



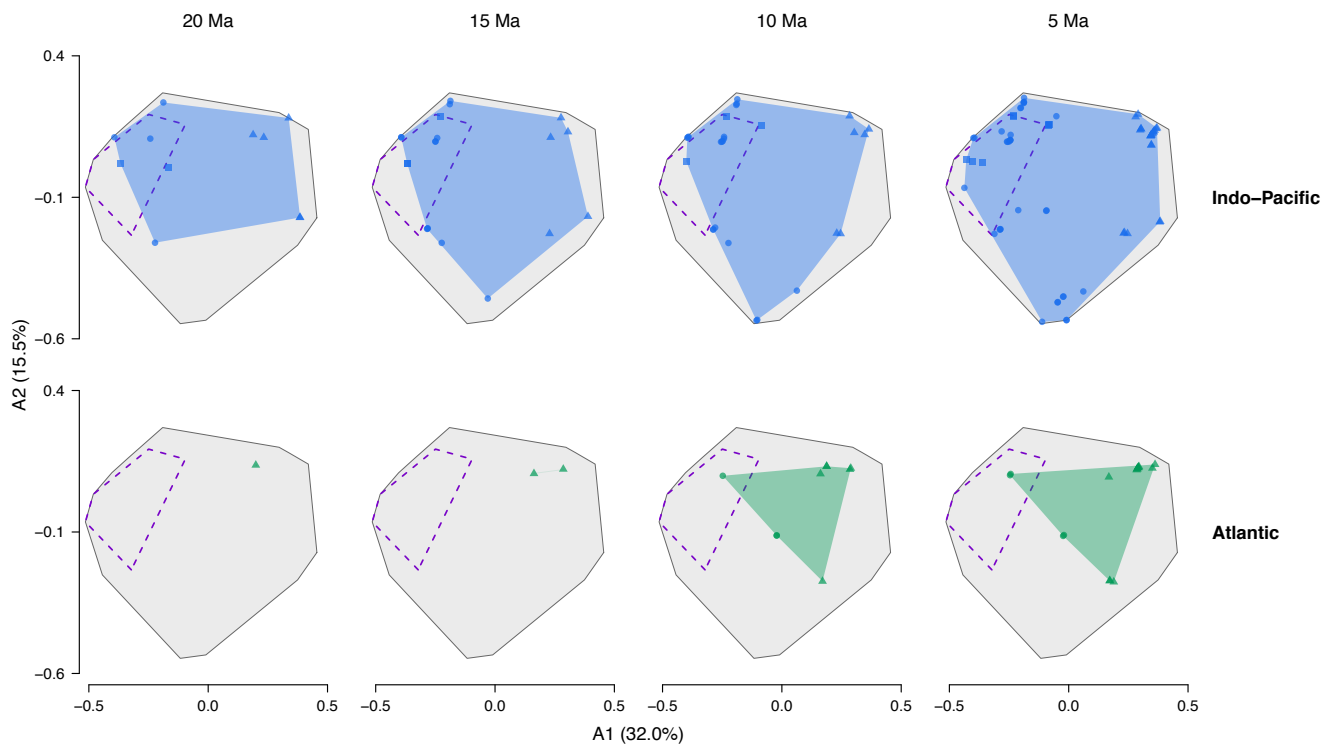

**Supplementary figure 17.** Multidimensional trait space occupied by surgeonfish (circles), rabbitfish (squares) and parrotfish (triangles) lineages in two biogeographic regions through time. Plots show the two first axes (A1-A2) derived from a PCoA performed on seven traits related to feeding. Each column represents a time-slice (20-5 Ma) in which we assessed the traits through ancestral reconstructions using hidden Markov models (see Supplementary methods). The Extant column represents trait space of extant species. Background grey area shows the total space occupied combining fossils, time-slices and extant species. Convex hulls represent space occupied by Atlantic (green), Indo-Pacific (blue) and Tethys (50 Ma; purple dashed line) lineages. Symbols represent lineages present in each point in time.

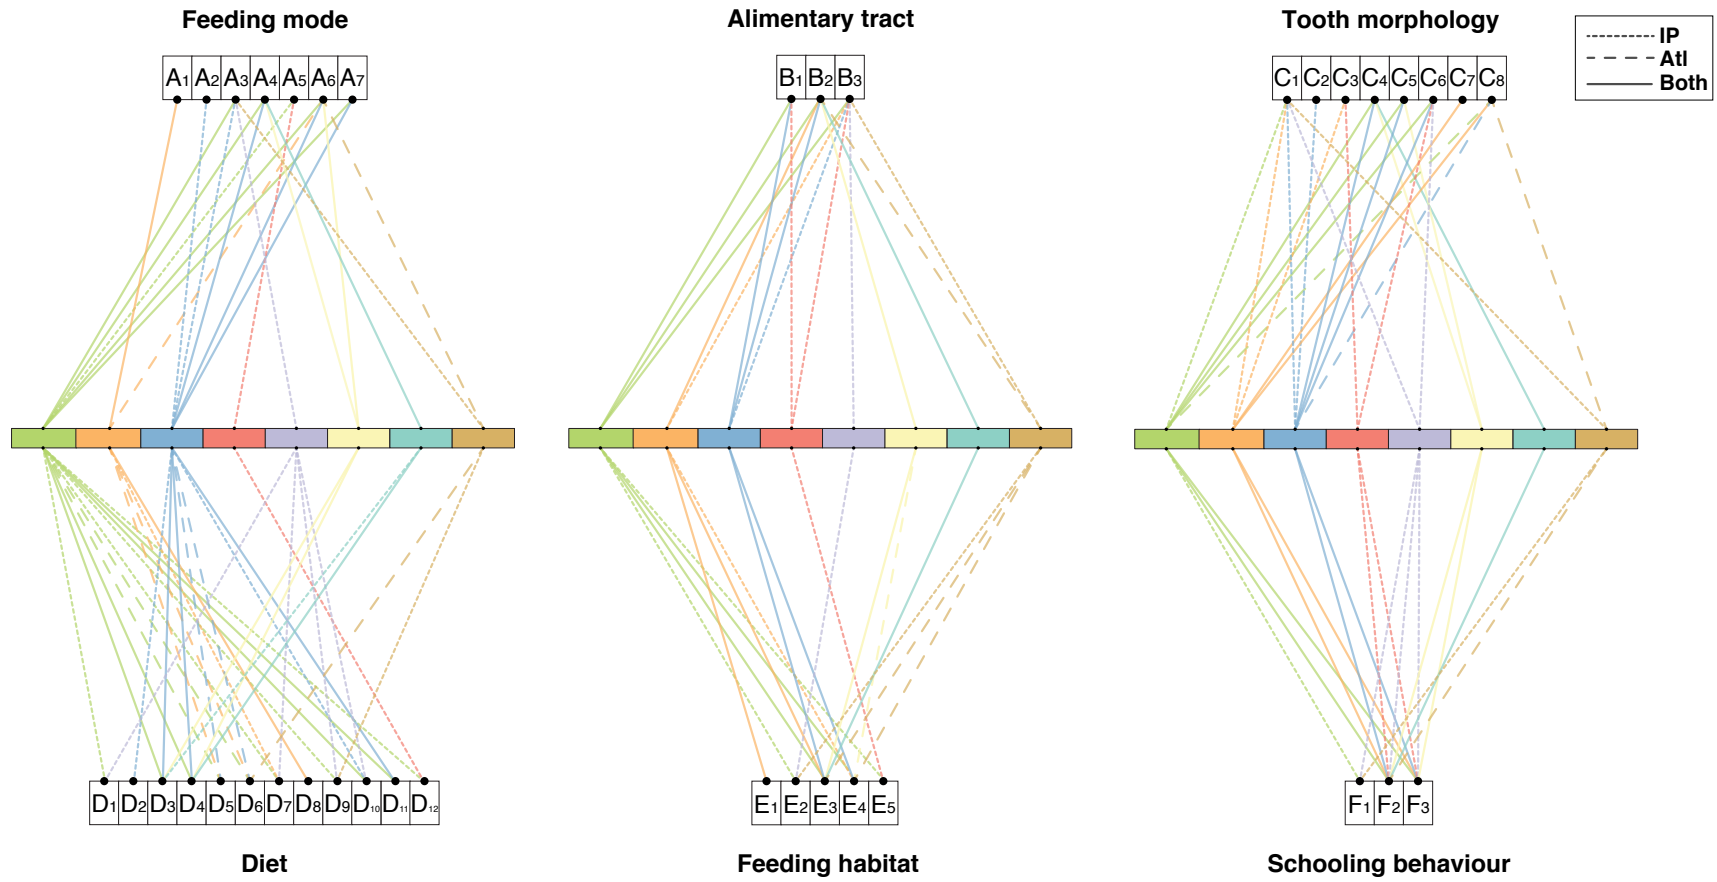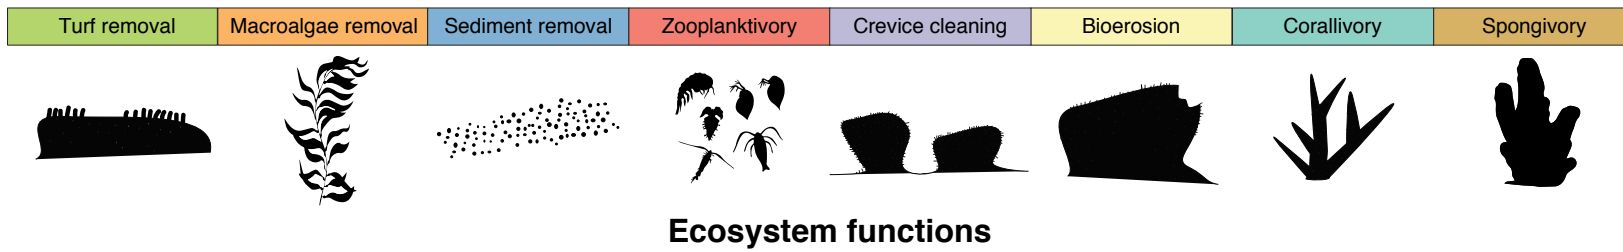

**Supplementary figure 18.** Trait states of herbivorous coral reef fishes mapped with their respective ecosystem functions. Trait coding: Feeding mode (A1 - Browser; A2 - Brusher; A3 - Cropper; A4 - Excavator; A5 -Planktivore; A6 - Scraper; A7 - Sucker) ; Alimentary tract (B1 - Gizzard-like; B2 - Pharyngeal mill; B3 - Thin-walled); Tooth morphology (C1 - Bicuspid; C2 - Brush; C3 - Conical; C4 - Fused-crenelated; C5 -Fused-even; C6 - Multi-denticulate; C7 - Not fused; C8 - Weakly fused); Diet (D1 - Cyanobacteria; D2 -Detritus; D3 - EAM; D4 - EAM + Coral; D5 -EAM + Macroalgae; D6 - EAM + Macroalgae + Sponges; D7 - Macroalgae; D8 - Seagrass + Macroalgae; D9 - Sponges; D10 - Turf-algae; D11 -Turf + Detritus; D12 - Zooplankton); Feeding habitat (E1 - off-reef; E2 - reef-concealed; E3 - reef-open; E4 - reef-sand; E5 - water column); Schooling behaviour (F1 - Pairing; F2 - Schooling; F3 - Solitary).

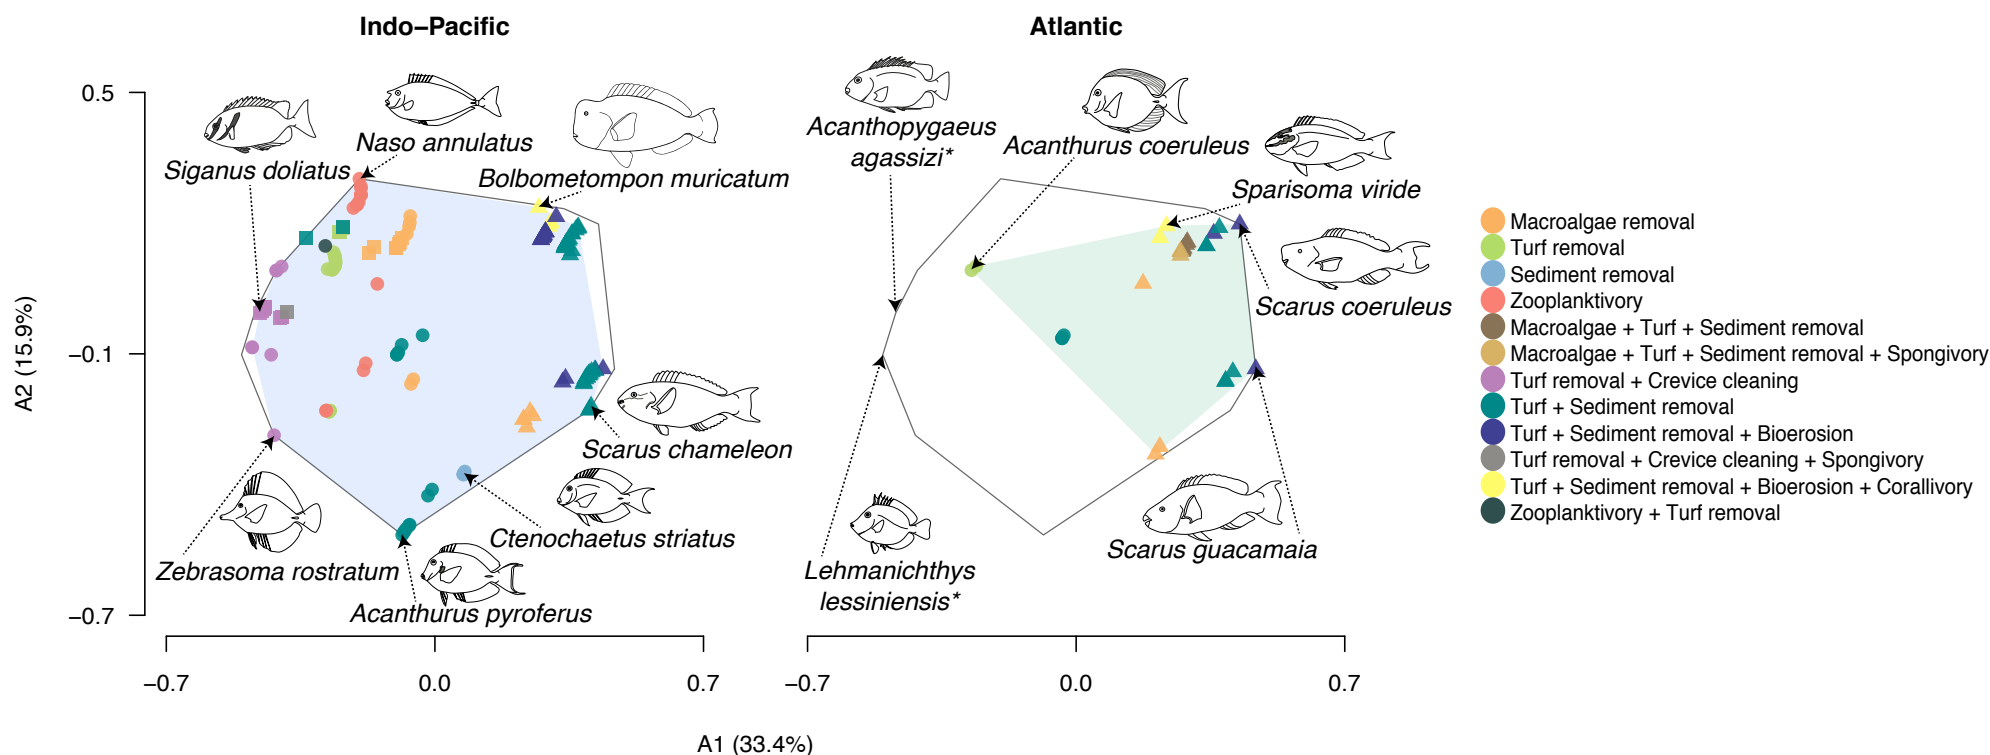

**Supplementary figure 19.** Multidimensional trait space occupied by extant surgeonfish (circles), rabbitfish (squares) and parrotfish (triangles) species in two biogeographic regions. Plots show the first two axes (A1-A2) derived from a principal coordinate analysis (PCoA) performed on seven traits related to feeding. Points are coloured according to the ecosystem functions performed by each species. Grey contour shows the total space occupied combining fossils, time-slices and extant species. Convex hulls represent space occupied by Indo-Pacific (blue) and Atlantic (green) species. Illustrations show representatives from each biogeographical realm and two fossil species (\*).

## Supplementary tables

**Supplementary table 1.** Biogeographical model comparison for Siganidae ordered according to lowest AICc. LnL: log-likelihood; d: dispersal; e: extinction; j: founder-speciation event parameter; w: dispersal multiplier matrix power exponential parameter; AICc: Akaike Information Criteria corrected for sample size; AIC\_wt: Akaike Information Criteria weight.

| Models          | LnL    | params | d    | e     | j        | w    | AICc  | AICc wt  |
|-----------------|--------|--------|------|-------|----------|------|-------|----------|
| DEC             | -67.9  | 2      | 0.16 | 0.042 | 0        | 1    | 140.3 | 0.62     |
| DEC+J           | -67.9  | 3      | 0.16 | 0.042 | 1.00E-05 | 1    | 142.9 | 0.17     |
| DEC+W           | -68.31 | 3      | 0.15 | 0.047 | 0        | 0.68 | 143.7 | 0.11     |
| DEC+J+W         | -67.86 | 4      | 0.16 | 0.042 | 1.00E-05 | 1.11 | 145.6 | 0.044    |
| DIVALIKE        | -71.57 | 2      | 0.18 | 0.046 | 0        | 1    | 147.7 | 0.016    |
| BAYAREALIKE+J   | -70.59 | 3      | 0.11 | 0.061 | 0.13     | 1    | 148.3 | 0.012    |
| BAYAREALIKE     | -72.63 | 2      | 0.13 | 0.083 | 0        | 1    | 149.8 | 0.0055   |
| DIVALIKE+J      | -71.49 | 3      | 0.21 | 0.052 | 1.00E-05 | 1    | 150.1 | 0.0048   |
| DIVALIKE+W      | -71.95 | 3      | 0.18 | 0.057 | 0        | 0.76 | 151   | 0.003    |
| BAYAREALIKE+J+W | -70.58 | 4      | 0.11 | 0.061 | 0.13     | 1.08 | 151.1 | 0.0029   |
| DIVALIKE+J+W    | -71.55 | 4      | 0.2  | 0.051 | 1.00E-05 | 0.93 | 153   | 0.0011   |
| BAYAREALIKE+W   | -75.38 | 3      | 0.14 | 0.094 | 0        | 0.16 | 157.9 | 9.70E-05 |

**Supplementary table 2.** Biogeographical model comparison for Acanthuridae ordered according to lowest AICc. LnL: log-likelihood; d: dispersal; e: extinction; j: founder-speciation event parameter; w: dispersal multiplier matrix power exponential parameter; AICc: Akaike Information Criteria corrected for sample size; AIC\_wt: Akaike Information Criteria weight.

| Models          | LnL    | params | d    | e     | j     | w      | AICc  | AICc wt  |
|-----------------|--------|--------|------|-------|-------|--------|-------|----------|
| BAYAREALIKE+J+W | -201.9 | 4      | 0.11 | 0.045 | 0.33  | 0.63   | 412.4 | 0.58     |
| BAYAREALIKE+J   | -203.4 | 3      | 0.13 | 0.051 | 0.35  | 1      | 413.1 | 0.41     |
| DEC+J+W         | -206   | 4      | 0.22 | 0.036 | 0.095 | 0.57   | 420.6 | 0.0097   |
| DEC+J           | -211   | 3      | 0.26 | 0.04  | 0.14  | 1      | 428.3 | 0.0002   |
| DEC             | -212.5 | 2      | 0.22 | 0.025 | 0     | 1      | 429.1 | 0.0001   |
| DIVALIKE+W      | -213.7 | 3      | 0.3  | 0.051 | 0     | 0.6    | 433.8 | 1.30E-05 |
| DIVALIKE+J+W    | -213.9 | 4      | 0.29 | 0.05  | 0.11  | 0.62   | 436.3 | 3.70E-06 |
| DIVALIKE+J      | -217.7 | 3      | 0.33 | 0.052 | 0.036 | 1      | 441.7 | 2.50E-07 |
| DEC+W           | -218.2 | 3      | 0.15 | 0.032 | 0     | 0.0049 | 442.7 | 1.60E-07 |
| DIVALIKE        | -223.3 | 2      | 0.2  | 0.032 | 0     | 1      | 450.7 | 2.80E-09 |
| BAYAREALIKE     | -224   | 2      | 0.26 | 0.13  | 0     | 1      | 452.3 | 1.30E-09 |
| BAYAREALIKE+W   | -228   | 3      | 0.13 | 0.099 | 0     | 0.17   | 462.4 | 8.00E-12 |

**Supplementary table 3.** Biogeographical model comparison for Scarini ordered according to lowest AICc. LnL: log-likelihood; d: dispersal; e: extinction; j: founder-speciation event parameter; w: dispersal multiplier matrix power exponential parameter; AICc: Akaike Information Criteria corrected for sample size; AIC\_wt: Akaike Information Criteria weight.

| Models          | LnL    | params | d     | e      | j     | w      | AICc  | AICc_wt  |
|-----------------|--------|--------|-------|--------|-------|--------|-------|----------|
| DEC+J+W         | -197.5 | 4      | 0.091 | 0.0087 | 0.06  | 0.46   | 403.5 | 0.48     |
| DEC+J           | -199   | 3      | 0.098 | 0.0087 | 0.057 | 1      | 404.3 | 0.32     |
| DEC             | -200.6 | 2      | 0.12  | 0.014  | 0     | 1      | 405.3 | 0.2      |
| BAYAREALIKE+J+W | -202   | 4      | 0.051 | 0.023  | 0.19  | 0.51   | 412.5 | 0.0054   |
| BAYAREALIKE+J   | -204.3 | 3      | 0.056 | 0.027  | 0.2   | 1      | 415   | 0.0015   |
| DEC+W           | -204.5 | 3      | 0.093 | 0.018  | 0     | 0.0014 | 415.2 | 0.0014   |
| DIVALIKE+J+W    | -206.4 | 4      | 0.11  | 0.0075 | 0.065 | 0.48   | 421.3 | 6.40E-05 |
| DIVALIKE+J      | -209.6 | 3      | 0.12  | 0.0078 | 0.079 | 1      | 425.5 | 7.80E-06 |
| DIVALIKE+W      | -212.8 | 3      | 0.092 | 0.0097 | 0     | 0.05   | 431.9 | 3.30E-07 |
| DIVALIKE        | -215.7 | 2      | 0.094 | 0.018  | 0     | 1      | 435.5 | 5.30E-08 |
| BAYAREALIKE     | -224.9 | 2      | 0.13  | 0.12   | 0     | 1      | 454   | 5.10E-12 |
| BAYAREALIKE+W   | -232.9 | 3      | 0.059 | 0.076  | 0     | 0.012  | 472.1 | 6.20E-16 |

**Supplementary table 4.** Genetic accession numbers used to build the Siganidae phylogeny.

| Species                       | 16s      | Cytb     | ITS1     |
|-------------------------------|----------|----------|----------|
| <i>Siganus argenteus</i>      | DQ898097 | AB276803 | AB276971 |
| <i>Siganus canaliculatus</i>  | EF210164 | AB276851 | AB276988 |
| <i>Siganus corallinus</i>     | DQ898105 | AB276936 | AB277043 |
| <i>Siganus doliatus</i>       | DQ898107 | AB276957 | AB277054 |
| <i>Siganus fuscescens</i>     | DQ898101 | AB276831 | AB276981 |
| <i>Siganus guttatus</i>       | DQ898108 | AB276913 | AB277025 |
| <i>Siganus javus</i>          | DQ898109 | AB276852 | AB276995 |
| <i>Siganus lineatus</i>       |          | AB276918 | AB277034 |
| <i>Siganus luridus</i>        | DQ898111 | AM949027 |          |
| <i>Siganus magnificus</i>     |          | AB276882 | AB277005 |
| <i>Siganus puellus</i>        | DQ898112 | AB276867 | AB276997 |
| <i>Siganus punctatissimus</i> |          | AB276872 | AB276999 |
| <i>Siganus punctatus</i>      | DQ898113 | AB276879 | AB277001 |
| <i>Siganus randalli</i>       |          | EF210188 |          |
| <i>Siganus rivulatus</i>      | JX026505 | EU601390 |          |
| <i>Siganus spinus</i>         | DQ898117 | AB276818 | AB276975 |
| <i>Siganus unimaculatus</i>   | EF210170 | AB276889 | AB277010 |
| <i>Siganus uspi</i>           |          | AB276881 | AB277003 |
| <i>Siganus vermiculatus</i>   | DQ898118 | AB276904 | AB277021 |
| <i>Siganus virgatus</i>       | EF210171 | AB276949 |          |
| <i>Siganus vulpinus</i>       | DQ898119 | AB276902 | AB277051 |
| <i>Siganus woodlandi</i>      | DQ898120 | AB276793 | AB276968 |
| <i>Siganus stellatus</i>      | DQ532960 | KT953191 |          |
| <i>Siganus sutor</i>          |          | MF326167 |          |
| <i>Prionurus scalprum</i>     | AY264591 | AB276963 | AB277066 |
| <i>Zanclus cornutus</i>       | AY057282 | AB276965 | AB375558 |

**Supplementary table 5.** Genetic accession numbers used to build the Acanthuridae phylogeny.

| Species                         | Cox1     | Cytb     | ENC1     | ETS2     | myh6     | plagl2   | Rag1     | Rh       | zic1     |
|---------------------------------|----------|----------|----------|----------|----------|----------|----------|----------|----------|
| <i>Acanthurus achilles</i>      | KC623654 | KC623692 | KC623730 |          | KC623763 | KC623798 | KC623828 | KC623863 | KC623902 |
| <i>Acanthurus auranticavus</i>  | KC623655 | KC623693 | KC623731 |          | KC623764 | KC623799 | KC623829 | KC623864 | KC623903 |
| <i>Acanthurus bahianus</i>      |          | FJ905179 |          |          | JX189759 | JX189441 | JX189919 |          | JX189146 |
| <i>Acanthurus bariene</i>       | KC623657 | KC623695 | KC623733 |          | KC623766 | KC623801 | KC623831 | KC623866 | KC623905 |
| <i>Acanthurus blochii</i>       | HM034180 | AY264632 | KC623734 | AY264685 | KC623767 | KC623802 | KC623832 | KC623867 | KC623906 |
| <i>Acanthurus chirurgus</i>     | KC623658 | KC623696 | KC623735 |          | KC623768 | KC623803 | KC623833 | KC623868 | KC623907 |
| <i>Acanthurus coeruleus</i>     | KC623659 | KC623697 | KC623736 |          | KC623769 | KC623804 | KC623834 | KC623869 | KC623908 |
| <i>Acanthurus dussumieri</i>    |          | AY264633 |          | AY264686 |          |          |          |          |          |
| <i>Acanthurus gahhm</i>         |          | KT953166 |          | KT953202 |          |          |          |          |          |
| <i>Acanthurus guttatus</i>      | KC623660 | KC623698 | EF539241 |          | EF536294 | EF536256 | EF530094 | KC623870 | EF533917 |
| <i>Acanthurus japonicus</i>     | KC623661 | KC623699 | KC623737 |          | KC623770 | KC623805 | KC623835 | KC623871 | KC623909 |
| <i>Acanthurus leucocheilus</i>  | KC623662 | KC623700 |          |          |          | KC623806 | KC623836 | KC623872 | KC623910 |
| <i>Acanthurus leucosternon</i>  | KC623663 | EU136032 | KC623738 |          | KC623771 | KC623807 | KC623837 | KC623873 | KC623911 |
| <i>Acanthurus lineatus</i>      | KC623664 | EU273284 | KC623739 |          | KC623772 | KC623808 | KC623838 | KC623874 | KC623912 |
| <i>Acanthurus maculiceps</i>    | KY683548 |          |          |          |          |          |          |          |          |
| <i>Acanthurus mata</i>          | KC623665 | KC623701 | KC623740 |          | KC623773 | KC623809 | KC623839 | KC623875 | KC623913 |
| <i>Acanthurus monroviae</i>     | KC623666 | KC623702 | KC623741 |          | KC623774 | KC623810 | KC623840 | KC623876 | KC623914 |
| <i>Acanthurus nigricans</i>     | KC623667 | KC623703 | KC623742 | AY264687 | KC623775 | KC623811 | KC623841 | KC623877 | KC623915 |
| <i>Acanthurus nigricauda</i>    | HM034189 | KC623704 | KC623743 |          | KC623776 | KC623812 | KC623842 | KC623878 | KC623916 |
| <i>Acanthurus nigrofuscus</i>   | KC623668 | KC623705 | KC623744 | AY264688 | KC623777 | KC623813 | KC623843 | KC623879 | KC623917 |
| <i>Acanthurus nigroris</i>      |          | KC623706 |          |          |          |          |          |          |          |
| <i>Acanthurus nubilus</i>       | HM034193 | AY264636 |          | AY264689 |          |          |          |          |          |
| <i>Acanthurus olivaceus</i>     | KC623669 | KC623707 | KC623745 | AY264690 | KC623778 | KC623814 | KC623844 | KC623880 | KC623918 |
| <i>Acanthurus polyzona</i>      | JQ349664 |          |          |          |          |          |          |          |          |
| <i>Acanthurus pyroferus</i>     | KC623670 | KC623708 | KC623746 | AY264691 | KC623779 | KC623815 | KC623845 | KC623881 | KC623919 |
| <i>Acanthurus reversus</i>      | KY683549 |          |          |          |          |          |          |          |          |
| <i>Acanthurus sohal</i>         | MF123727 | KT953172 |          | KT953208 |          |          |          |          |          |
| <i>Acanthurus tennentii</i>     | KC623671 | KC623709 | KC623747 |          | KC623780 | KC623816 | KC623846 | KC623882 | KC623920 |
| <i>Acanthurus thompsoni</i>     | KC623672 | KC623710 | KC623748 |          | KC623781 | KC623817 | KC623847 | KC623883 | KC623921 |
| <i>Acanthurus tractus</i>       | KC623673 | KC623694 | KC623732 |          | KC623765 | KC623800 | KC623830 | KC623865 | KC623904 |
| <i>Acanthurus triostegus</i>    | KC623673 | KC623711 | EF539242 | AY264692 | EF536295 | EF536257 | EF530095 | KC623884 | EF533918 |
| <i>Acanthurus xanthopterus</i>  | KC623674 | KC623712 | KC623749 | AY264693 | KC623782 | KC623818 | KC623848 | KC623885 | KC623922 |
| <i>Ctenochaetus binotatus</i>   |          | KC623713 | KC623750 | AY264694 | KC623783 |          | KC623849 | KC623886 | KC623923 |
| <i>Ctenochaetus flavicauda</i>  | HM034209 |          |          |          |          |          |          |          |          |
| <i>Ctenochaetus striatus</i>    | KC623675 | KC623714 | EF539243 | AY264695 | EF536296 | EF536258 | EF530096 |          | EF533919 |
| <i>Ctenochaetus strigosus</i>   | KC623676 | FJ376811 | KC623751 |          | KC623784 | KC623819 | KC623850 | KC623887 | KC623924 |
| <i>Ctenochaetus tominiensis</i> | KC623677 | KC623715 | KC623752 |          | KC623785 | KC623820 | KC623851 |          | KC623925 |
| <i>Ctenochaetus truncatus</i>   | KC623678 | KC623716 | KC623753 |          | KC623786 | KC623821 | KC623852 | KC623888 | KC623926 |
| <i>Naso annulatus</i>           | HM034155 | AY264643 |          | AY264696 |          |          |          |          |          |
| <i>Naso brachycentron</i>       |          | AY264644 |          | AY264697 |          |          |          |          |          |
| <i>Naso brevirostris</i>        | KC623679 | KC623717 | EF539240 | AY264698 | EF536293 | EF536255 | EF530093 | KC623889 | EF533916 |
| <i>Naso caeruleacauda</i>       |          | AY264646 |          | AY264699 |          |          |          |          |          |
| <i>Naso caesius</i>             |          | AY264647 |          | AY264700 |          |          |          |          |          |
| <i>Naso elegans</i>             | KC623680 | KC623718 | KC623754 | AY264701 |          |          | KC623853 | KC623890 |          |
| <i>Naso fageni</i>              |          | AY264649 |          | AY264702 |          |          |          |          |          |
| <i>Naso hexacanthus</i>         |          | AY264650 |          | AY264703 |          |          |          |          |          |
| <i>Naso lituratus</i>           | HM034247 | AY264651 | EF539239 | AY264704 | EF536292 | EF536254 | EF530092 | EU637984 | EF533915 |
| <i>Naso lopezi</i>              | AP009163 | AY264652 |          | AY264705 |          |          |          |          |          |
| <i>Naso maculatus</i>           |          | AY264653 |          | AY264706 |          |          |          |          |          |
| <i>Naso mcdadei</i>             |          | AY264654 |          | AY264707 |          |          |          |          |          |
| <i>Naso minor</i>               |          | AY264655 |          | AY264708 |          |          |          |          |          |
| <i>Naso reticulatus</i>         |          | AY264656 |          | AY264709 |          |          |          |          |          |
| <i>Naso thynnoides</i>          |          | AY264657 |          | AY264710 |          |          |          |          |          |
| <i>Naso tonganus</i>            |          | AY264658 |          | AY264711 |          |          |          |          |          |
| <i>Naso tuberosus</i>           |          | AY264659 |          | AY264712 |          |          |          |          |          |
| <i>Naso unicornis</i>           | KC623681 | KC623719 | KC623755 | AY264713 | KC623787 | KC623822 | KC623854 | KC623891 | KC623927 |
| <i>Naso vlamingii</i>           | KC623682 | KC623720 | KC623756 | AY264714 | KC623788 | KC623823 | KC623855 | KC623892 | KC623928 |

| Species                         | Cox1     | Cytb     | ENC1     | ETS2     | myh6     | plag12   | Rag1     | Rh       | zic1     |
|---------------------------------|----------|----------|----------|----------|----------|----------|----------|----------|----------|
| <i>Paracanthurus hepatus</i>    | KC623683 | KC623721 | EF539244 | AY264680 | EF536297 | EF536259 | EF530097 | KC623893 | EF533920 |
| <i>Prionurus biafraensis</i>    | KC623684 | KC623722 | KC623757 |          | KC623789 | KC623824 | KC623856 | KC623894 | KP280517 |
| <i>Prionurus chrysurus</i>      | KP280488 |          |          |          |          |          | KP280510 |          | KP280518 |
| <i>Prionurus laticlavus</i>     | KC623685 | KC623723 | KC623758 |          | KC623790 | KC623825 | KC623857 | KC623895 | KP280519 |
| <i>Prionurus maculatus</i>      | KC623687 | KC623725 |          |          | KC623792 |          |          | KC623897 | KC623932 |
| <i>Prionurus microlepidotus</i> |          | KC623726 |          | AY264681 | KC623793 | EF536260 | KC623859 |          | EF533921 |
| <i>Prionurus punctatus</i>      | KC623686 | KC623724 | KC623759 |          | KC623791 |          | KC623858 | KC623896 | KC623931 |
| <i>Prionurus scalprum</i>       |          | AY264629 |          | AY264682 |          |          |          |          |          |
| <i>Zebrasoma desjardini</i>     | KC623688 | KC623727 | KC623760 |          | KC623794 |          | KC623860 | KC623898 | KC623934 |
| <i>Zebrasoma flavescens</i>     | KC623689 | AP006032 | KC623761 |          | KC623795 | KC623827 | KC623861 | KC623899 | KC623935 |
| <i>Zebrasoma gemmatum</i>       | JF494799 |          |          |          |          |          |          |          |          |
| <i>Zebrasoma rostratum</i>      | HM034282 |          |          |          |          |          | KF141385 |          | KF140659 |
| <i>Zebrasoma scopas</i>         | KC623690 | KC623728 | EF539238 | AY264683 | KC623796 | EF536253 | AY308776 | KC623900 | KC623936 |
| <i>Zebrasoma velifer</i>        | KC623691 | KC623729 | KC623762 | AY264684 | KC623797 |          | KC623862 | KC623901 | KC623937 |
| <i>Zebrasoma xanthurum</i>      | MF124084 | KT953199 |          | KT953235 |          |          |          |          |          |
| <i>Zanclus cornutus</i>         | KC623652 | AY264626 | EF539247 | AY264679 | EF536300 | EF536262 | EF530100 |          | EF533923 |
| <i>Luvarus imperialis</i>       | KC623653 | AY264625 | EF539246 | AY264678 | EF536299 | EF536261 | EF530099 | EU637975 | EF533922 |

**Supplementary table 6.** Genetic accession numbers used to build the Scarini phylogeny.

| Species                            | 12s      | 16s      | Bmp4     | Control region | Cox1     | Cytb     | Dlx2     | Otx1     | Rag2     | S711     | Tmo-4C4  |
|------------------------------------|----------|----------|----------|----------------|----------|----------|----------|----------|----------|----------|----------|
| <i>Bolbometapon muricatum</i>      | EU601178 | AY081091 | EU601456 |                | NC033901 | NC033901 | EU601506 | EU601406 | EU601307 | JX026592 | AY081108 |
| <i>Calotomus carolinus</i>         | EU601179 | AY081092 | EU601457 |                | JQ349815 | EU601358 | EU601507 | EU601407 | EU601308 |          | AY081109 |
| <i>Calotomus spinidens</i>         | EU601180 | EU601228 | EU601458 |                | KJ202134 | EU601359 | EU601508 | EU601408 | EU601309 |          | EU601265 |
| <i>Calotomus zonarchus</i>         |          |          |          |                | DQ521016 |          |          |          |          |          |          |
| <i>Cetoscarus bicolor</i>          | EU601181 | EU601229 | EU601459 |                | JQ349874 | EU601360 | EU601509 | EU601409 | EU601310 | JX026593 | AY081105 |
| <i>Chlorurus atrilunula</i>        |          | JX026457 |          | JX026525       |          |          |          |          |          | JX026596 |          |
| <i>Chlorurus bleekeri</i>          | EU601182 | EU601230 | EU601460 | JX026526       |          | EU601361 | EU601510 | EU601410 | EU601311 | JX026597 | EU601267 |
| <i>Chlorurus bowersi</i>           | EU601183 | EU601231 | EU601461 | JX026527       |          | EU601362 | EU601511 | EU601411 | EU601312 | JX026598 | EU601268 |
| <i>Chlorurus capistratoides</i>    | EU601184 | EU601232 | EU601462 | JX026528       |          | EU601363 | EU601512 | EU601412 | EU601313 | JX026599 | EU601269 |
| <i>Chlorurus cyanescens</i>        |          | JX026461 |          | JX026529       |          |          |          |          |          | JX026600 |          |
| <i>Chlorurus enneacanthus</i>      |          | JX026462 |          | JX026530       |          |          |          |          |          | JX026601 |          |
| <i>Chlorurus frontalis</i>         | AB974582 | JX026463 |          | JX026531       | JQ431620 | LC068812 |          |          |          | JX026602 |          |
| <i>Chlorurus gibbus</i>            |          | JX026464 |          | JX026532       |          |          |          |          |          |          |          |
| <i>Chlorurus japonensis</i>        | EU601209 | EU601250 | EU601487 | JX026533       |          | EU601388 | EU601537 | EU601437 | EU601338 | JX026603 | EU601288 |
| <i>Chlorurus microrhinos</i>       | EU601185 | EU601233 | EU601463 | JX026534       |          | EU601364 | EU601513 | EU601413 | EU601314 | JX026604 | EU601270 |
| <i>Chlorurus oedema</i>            | EU601186 | EU601234 | EU601464 | JX026535       |          | EU601365 | EU601514 | EU601414 | EU601315 | JX026605 | AY081107 |
| <i>Chlorurus perspicillatus</i>    |          | JX026468 |          | JX026536       |          | KF809191 |          |          |          | JX026606 |          |
| <i>Chlorurus rhakoura</i>          |          | JX026469 |          | JX026537       |          |          |          |          |          | JX026607 |          |
| <i>Chlorurus sordidus</i>          |          |          | EU601465 | JX026539       | EU601367 | NC006355 |          | EU601415 |          | JX026609 | AY081106 |
| <i>Chlorurus spilurus</i>          |          | JX026470 |          | JX026538       |          |          |          |          |          | JX026608 |          |
| <i>Chlorurus strongylocephalus</i> |          | JX026472 |          | JX026540       |          |          |          |          |          | JX026610 |          |
| <i>Cryptotomus roseus</i>          | AY279592 | AY279695 | EU601466 |                | JQ839422 | EU601367 | EU601516 | EU601416 | AY279901 |          | AY279798 |
| <i>Hipposcarus harid</i>           |          | JX026455 |          | JX026523       |          |          |          |          |          | JX026594 |          |
| <i>Hipposcarus longiceps</i>       | EU601189 | AY081093 | EU601467 | JX026524       | KF929973 | EU885924 | EU601517 | EU885926 | EU601318 | JX026595 | AY081110 |
| <i>Leptoscarus vaigiensis</i>      | EU601190 | AY081094 | EU601468 |                | FJ237788 | EU601369 |          | EU601418 | EU601319 |          | AY081111 |
| <i>Nicholsina denticulata</i>      | U95761   | U95762   |          |                |          | DQ457021 |          |          |          |          |          |
| <i>Nicholsina usta</i>             |          |          | EU601469 |                |          | DQ457023 |          | EU601419 | AY279933 |          | AY081112 |
| <i>Scarus altipinnis</i>           | EU601192 | EU601237 | EU601470 | JX026541       | JQ432095 | EU601371 | EU601520 | EU601420 | EU601321 | JX026611 | EU601273 |
| <i>Scarus arabicus</i>             |          | JX026474 |          | JX026542       |          |          |          |          |          | JX026612 |          |
| <i>Scarus chameleon</i>            | EU601193 | EU601238 | EU601471 | JX026613       | FJ237917 | EU601372 | EU601521 | EU601421 | EU601322 | JX026613 | EU601274 |
| <i>Scarus coelestinus</i>          | EU601194 | AY081084 | EU601472 | JX026544       |          | EU601373 | EU601522 | EU601422 | EU601323 | JX026614 | AY081101 |
| <i>Scarus coeruleus</i>            |          | JX026476 |          | JX026545       |          |          |          |          |          | JX026615 |          |
| <i>Scarus collana</i>              |          |          | KY815801 | JX026546       |          |          |          |          |          | JX026616 | KY815559 |
| <i>Scarus compressus</i>           |          | JX026478 |          | JX026547       |          |          |          |          |          | JX026617 |          |
| <i>Scarus dimidiatus</i>           | AY279642 | AY279745 | EU601473 | JX026548       |          | EU601374 | EU601523 | EU601423 | AY279951 | JX026618 | AY279848 |
| <i>Scarus dubius</i>               |          | JX026480 |          | JX026549       |          | KF809216 |          |          |          | JX026619 |          |
| <i>Scarus falcipinnis</i>          |          | JX026481 |          | JX026550       |          |          |          |          |          | JX026620 |          |
| <i>Scarus ferrugineus</i>          |          |          | KY815802 | JX026551       |          |          |          |          |          | JX026621 | KU862922 |
| <i>Scarus festivus</i>             | EU601196 | EU601239 | EU601474 | JX026552       |          | EU601375 | EU601524 | EU601424 | EU601325 | JX026622 | EU601276 |
| <i>Scarus flavipectoralis</i>      | EU601197 | AY081086 | EU601475 | JX026553       | KP194579 | EU601376 | EU601525 | EU601425 | EU601326 | JX026623 | AY081103 |
| <i>Scarus forsteni</i>             | EU601198 | EU601240 | EU601476 | JX026554       | NC011928 | NC011928 | EU601526 | EU601426 | EU601327 | JX026624 | EU601278 |
| <i>Scarus frenatus</i>             | AY279643 | AY279746 | EU601477 | JX026555       | KP194827 | EU601378 | EU601527 | EU601427 | AY279952 | JX026625 | AY081104 |
| <i>Scarus fuscopurpureus</i>       |          | JX026487 |          | JX026556       |          |          |          |          |          | JX026626 | KU862923 |
| <i>Scarus ghobban</i>              | EU601200 | EU601241 | EU601478 | JX026558       | NC011599 | NC011599 | EU601528 | EU601428 | EU601329 | JX026628 | KU862921 |
| <i>Scarus globiceps</i>            | EU601201 | EU601242 | EU601479 | JX026561       | JQ432103 | EU601380 | EU601529 | EU601429 | EU601330 | JX026631 | EU601280 |
| <i>Scarus guacamaia</i>            | EU601202 | EU601243 | EU601480 | JX026562       | JQ843039 | EU601381 | EU601530 | EU601430 | EU601331 | JX026632 | AY081102 |
| <i>Scarus hoefleri</i>             | AY141393 | JX026493 |          | JX026563       |          |          |          |          |          | JX026633 |          |



| Species                       | 12s      | 16s      | Bmp4     | Control region | Cox1     | Cytb     | Dlx2     | Otx1     | Rag2     | S711     | Tmo-4C4  |
|-------------------------------|----------|----------|----------|----------------|----------|----------|----------|----------|----------|----------|----------|
| <i>Scarus hypselopterus</i>   | EU601204 | EU601245 | EU601482 |                |          | EU601383 | EU601532 | EU601432 | EU601333 |          | EU601283 |
| <i>Scarus iseri</i>           | EU601203 | EU601244 | EU601481 | JX026564       | JQ842671 | EU601382 | EU601531 | EU601431 | EU601332 | JX026634 | EU601282 |
| <i>Scarus koputea</i>         |          | JX026495 |          | JX026565       |          |          |          |          |          | JX026635 |          |
| <i>Scarus longipinnis</i>     |          | JX026496 |          | JX026566       |          |          |          |          |          | JX026636 |          |
| <i>Scarus niger</i>           | EU601205 | JX026497 | EU601483 | JX026567       | KP194654 | KT953190 | EU601533 | EU601433 | EU601334 | JX026637 | KU862926 |
| <i>Scarus oviceps</i>         | EU601206 | EU601247 | EU601484 | JX026568       | JQ432106 | EU601385 | EU601534 | EU601434 | EU601335 | JX026638 | EU601285 |
| <i>Scarus ovifrons</i>        | LC092086 | JX026499 |          | JX026569       |          | LC068811 |          |          |          | JX026639 |          |
| <i>Scarus perrico</i>         |          | JX026500 |          | JX026570       |          |          |          |          |          | JX026640 |          |
| <i>Scarus persicus</i>        |          | JX026501 |          | JX026571       |          |          |          |          |          | JX026641 |          |
| <i>Scarus prasiognathos</i>   | EU601207 | EU601248 | EU601485 | JX026572       |          | EU601386 | EU601535 | EU601435 | EU601336 | JX026642 | EU601286 |
| <i>Scarus psittacus</i>       | EU601208 | EU601249 | EU601486 | JX026573       | JQ432113 | EU601387 | EU601536 | EU601436 | EU601337 | JX026643 | KU862925 |
| <i>Scarus quoyi</i>           | EU601210 | EU601251 | EU601488 | JX026574       | KF930376 | EU601389 | EU601538 | EU601438 | EU601339 | JX026644 | EU601289 |
| <i>Scarus rivalatus</i>       | EU601211 | EU601252 | EU601489 | JX026575       |          | EU601390 | EU601539 | EU601439 | EU601340 | JX026645 | EU601290 |
| <i>Scarus rubroviolaceus</i>  | EU601212 | EU601253 | EU601490 | JX026577       | NC011343 | NC011343 | EU601540 | EU601440 | EU601341 | JX026647 | EU601291 |
| <i>Scarus russelii</i>        |          | JX026510 |          | JX026580       | KF489744 |          |          |          |          | JX026650 | KU862927 |
| <i>Scarus scaber</i>          |          | JX026511 |          | JX026581       | JQ350333 |          |          |          |          | JX026651 |          |
| <i>Scarus schlegeli</i>       | EU601213 | EU601254 | EU601491 | JX026582       | NC011936 | NC011936 | EU601541 | EU601441 | EU601342 | JX026652 | EU601292 |
| <i>Scarus spinus</i>          | EU601214 | EU601255 | EU601492 | JX026583       | KP193990 | EU601393 | EU601542 | EU601442 | EU601343 | JX026653 | EU601293 |
| <i>Scarus taeniopterus</i>    | EU601215 | EU601256 | EU601493 | JX026584       | JQ842301 | EU601394 | EU601543 | EU601443 | EU601344 | JX026654 | EU601294 |
| <i>Scarus tricolor</i>        | EU601216 | EU601257 | EU601494 | JX026585       | JQ350335 | EU601395 | EU601544 | EU601444 | EU601345 | JX026655 | EU601295 |
| <i>Scarus trispinosus</i>     |          | JX026516 |          | JX026586       |          |          |          |          |          | JX026656 |          |
| <i>Scarus vetula</i>          |          |          |          | JX026587       | FJ584083 |          |          |          |          | JX026657 | KY815561 |
| <i>Scarus viridifucatus</i>   |          | JX026518 |          | JX026588       |          |          |          |          |          | JX026658 |          |
| <i>Scarus xanthopleura</i>    |          | JX026519 |          | JX026589       |          | LC068816 |          |          |          | JX026659 |          |
| <i>Scarus zelindae</i>        |          | JX026520 |          | JX026590       |          |          |          |          |          | JX026660 |          |
| <i>Scarus zufar</i>           |          | JX026521 |          | JX026591       |          |          |          |          |          | JX026661 |          |
| <i>Sparisoma amplum</i>       |          |          |          |                |          | DQ457024 |          |          |          |          |          |
| <i>Sparisoma atomarium</i>    | U95767   | U95768   |          |                | JQ840703 | DQ457029 |          |          |          |          |          |
| <i>Sparisoma aurofrenatum</i> | EU601217 | U95766   | EU601495 |                | JQ839898 | DQ457031 | EU601545 | EU601445 | EU601346 |          | AY081099 |
| <i>Sparisoma axillare</i>     | KC526954 | KC526953 |          |                |          | DQ457034 |          |          |          |          |          |
| <i>Sparisoma choati</i>       | AF114483 | AF115312 |          |                |          | DQ457036 |          |          |          |          |          |
| <i>Sparisoma chrysopterum</i> | AY279645 | AY279748 | EU601496 |                | GU225439 | DQ457033 | EU601546 | EU601446 | AY279954 |          | AY081100 |
| <i>Sparisoma cretense</i>     | U95777   | AF517578 |          |                | KC501534 | DQ457026 |          |          |          |          |          |
| <i>Sparisoma frondosum</i>    | JX645341 | JX645342 |          |                |          | DQ457032 |          |          |          |          |          |
| <i>Sparisoma radians</i>      | U95771   | U95772   |          |                |          | DQ457028 |          |          |          |          |          |
| <i>Sparisoma rocha</i>        | GU985521 | GU985520 |          |                |          |          |          |          |          |          |          |
| <i>Sparisoma rubripinne</i>   | KY815337 | U95774   |          |                | GU225443 | DQ457035 |          |          |          |          |          |
| <i>Sparisoma strigatum</i>    |          |          |          |                |          | DQ457027 |          |          |          |          |          |
| <i>Sparisoma tuliupiranga</i> |          |          |          |                |          | DQ457030 |          |          |          |          |          |
| <i>Sparisoma viride</i>       | EU601219 | AY081081 | EU601497 | AF370453       | JQ841013 | DQ457025 | EU601547 | EU601447 | EU601348 |          | AY081098 |
| <i>Achoerodus viridis</i>     | AY279574 | AY279677 | KY815674 |                | EF609278 |          | KY816077 | KY815925 | AY279883 |          | AY279780 |
| <i>Cheilinus abudjubbe</i>    |          |          |          |                |          | KY815828 |          |          | KY815584 |          | KY815482 |
| <i>Cheilinus chlorourus</i>   |          |          | KY815691 |                | KP194859 | KY815829 | KY816088 | KY815941 | KY815585 |          | KY815483 |
| <i>Cheilinus fasciatus</i>    | AY279580 | AY279683 | KY815692 |                | KP194612 | KY815830 | KY816089 | KY815942 | AY279889 |          | AY279786 |
| <i>Cheilinus lunulatus</i>    |          |          |          |                |          | KY815831 |          |          | KY815586 |          | KY815484 |
| <i>Cheilinus oxycephalus</i>  | AY279581 | AY279684 | KY815693 |                | KF929730 | KY815832 |          | KY815943 | AY279890 |          | AY279787 |
| <i>Cheilinus trilobatus</i>   |          |          | KY815694 |                | KP194018 | KY815833 | KY816090 | KY815944 | KY815587 |          | KY815485 |
| <i>Cheilinus undulatus</i>    | AY279582 | AY279685 | EU601498 |                | KM461717 | KM461717 | EU601548 | EU601448 | AY279891 |          | AY279788 |
| <i>Lachnolaimus maximus</i>   | AY279618 | AY279721 | EU601503 |                | GU224537 | EU601404 | EU601553 | EU601453 | AY279927 |          | AY279824 |

**Supplementary table 7.** Best gene partitioning scheme resulting from PartitionFinder for Siganidae.

| Subset | Model     | #sites | Genes |
|--------|-----------|--------|-------|
| 1      | SYM+I+G   | 512    | 16s   |
| 2      | GTR+I+G+X | 1140   | Cytb  |
| 3      | TRN+G+X   | 1349   | ITS1  |

**Supplementary table 8.** Best gene partitioning scheme resulting from PartitionFinder for Acanthuridae.

| Subset | Model     | #sites | Genes      |
|--------|-----------|--------|------------|
| 1      | GTR+I+G+X | 651    | Cox1       |
| 2      | GTR+I+G+X | 1047   | Cytb       |
| 3      | TRN+I+G+X | 1498   | ENC1, Myh6 |
| 4      | HKY+G+X   | 422    | ETS2       |
| 5      | GTR+G+X   | 567    | Plagl2     |
| 6      | SYM+I+G   | 1556   | Rag1       |
| 7      | GTR+I+G+X | 798    | Rh         |
| 8      | HKY+I+X   | 690    | Zic1       |

**Supplementary table 9.** Best gene partitioning scheme resulting from PartitionFinder for Scarini.

| Subset | Model     | #sites | Genes          |
|--------|-----------|--------|----------------|
| 1      | GTR+I+G+X | 935    | 12s            |
| 2      | GTR+I+G+X | 503    | 16s            |
| 3      | GTR+I+G+X | 1005   | Cox1, Cytb     |
| 4      | HKY+I+G+X | 433    | Control region |
| 5      | HKY+I+G+X | 480    | Bmp4           |
| 6      | HKY+G+X   | 516    | Dlx2           |
| 7      | GTR+I+G+X | 669    | Otx1           |
| 8      | SYM+I+G   | 714    | Rag2           |
| 9      | GTR+G+X   | 618    | S7I1           |
| 10     | GTR+I+G+X | 423    | Tmo-4C4        |

**Supplementary table 10.** Summary of BayesTraits model results for discrete traits for Siganidae. Posterior Modal values (lower; upper - Highest Density Interval) of Lh: likelihood; q: transition rates between states; #Br: number of branch lengths scaled using variable rates; #Nd: number of nodes scaled using variable rates. Trait states: Diet (0 - Cyanobacteria; 1 - Macroalgae; 2 - Sponges; 3 - Turf algae); Feeding Mode (0 - Browser; 1 - Cropper); Feeding Habitat (0 - off reef; 1 - reef-concealed; 2 - reef-open; 3 - reef-sand); Schooling behaviour (0 - Pairing; 1 - Schooling).

| Traits                 | Lh                            | q01                      | q02                      | q03                      | q10                      | q12                      | q13                      | q20                      | q21                      | q23                      | q30                      | q31                     | q32                      | #Br          | #Nd         |
|------------------------|-------------------------------|--------------------------|--------------------------|--------------------------|--------------------------|--------------------------|--------------------------|--------------------------|--------------------------|--------------------------|--------------------------|-------------------------|--------------------------|--------------|-------------|
| <b>Diet</b>            | -21.68<br>(-24.65;<br>-17.97) | 0.09<br>(0.006;<br>0.09) | 0.07<br>(0.006;<br>0.09) | 0.09<br>(0.01;<br>0.09)  | 0.01<br>(3e-5;<br>0.08)  | 0.01<br>(1e-4;<br>0.08)  | 0.09<br>(0.008;<br>0.09) | 0.08<br>(0.006;<br>0.09) | 0.09<br>(0.007;<br>0.09) | 0.08<br>(0.01;<br>0.09)  | 0.02<br>(1e-4;<br>0.07)  | 0.05<br>(0.01;<br>0.09) | 0.01<br>(1e-4;<br>0.08)  | 2<br>(0; 4)  | 0<br>(0; 2) |
| <b>Feeding Mode</b>    | -13.02<br>(-14.38;<br>-9.11)  | 0.08<br>(0.02;<br>0.10)  | -                        | -                        | 0.04<br>(0.01;<br>0.10)  | -                        | -                        | -                        | -                        | -                        | -                        | -                       | -                        | 2<br>(0; 5)  | 1<br>(0; 3) |
| <b>Feeding Habitat</b> | -15.10<br>(-20.82;<br>-12.54) | 0.02<br>(9e-4;<br>0.02)  | 0.02<br>(0.002;<br>0.02) | 0.02<br>(0.001;<br>0.02) | 0.01<br>(9e-6;<br>0.02)  | 0.02<br>(0.002;<br>0.02) | 0.005<br>(2e-6;<br>0.02) | 0.004<br>(4e-4;<br>0.02) | 0.006<br>(2e-4;<br>0.02) | 0.003<br>(1e-5;<br>0.02) | 0.02<br>(0.003;<br>0.02) | 0.01<br>(8e-4;<br>0.02) | 0.02<br>(0.001;<br>0.02) | 1<br>(0; 4)  | 1<br>(0; 3) |
| <b>Schooling</b>       | -8.59<br>(-56.40;<br>-41.87)  | 0.07<br>(9e-4;<br>0.009) | -                        | -                        | 0.02<br>(1e-6;<br>0.005) | -                        | -                        | -                        | -                        | -                        | -                        | -                       | -                        | 1<br>(2; 11) | 0<br>(2; 8) |

**Supplementary table 11.** Summary of BayesTraits model results for discrete traits for Acanthuridae. Posterior Modal values (lower; upper - Highest Density Interval) of Lh: likelihood; q: transition rates between states; #Br: number of branch lengths scaled using variable rates; #Nd: number of nodes scaled using variable rates. Trait states: Diet (0 - Detritus; 1 - Macroalgae; 2 - Turf algae; 3 - Turf+Detritus; 4 - Zooplankton); Feeding Mode (0 - Browser; 1 - Brusher; 2 - Cropper; 3 - Planktivore; 4 - Sucker); Feeding Habitat (0 - reef-concealed; 1 - reef-open; 2 - reef-sand; 3 - water column); Tooth morphology (0 - Brush; 1 - Conical; 2 - Multi-denticulate); Alimentary tract (0 - Gizzard-like; 1 - Thin walled); Schooling behaviour (0 - Pairing; 1 - Schooling; 2 - Solitary).

| Traits                  | Lh                            | q01                       | q02                       | q03                     | q04                     | q10                      | q12                        | q13                     | q14                     | q20                      | q21                        | q23                     | q24                      |
|-------------------------|-------------------------------|---------------------------|---------------------------|-------------------------|-------------------------|--------------------------|----------------------------|-------------------------|-------------------------|--------------------------|----------------------------|-------------------------|--------------------------|
| <b>Diet</b>             | -48.67<br>(-54.50;<br>-40.55) | 1e-5<br>(40.55;<br>9e-4)  | 1e-5<br>(1e-8;<br>9e-4)   | 8e-4<br>(1e-8;<br>9e-4) | 8e-4<br>(1e-8;<br>9e-4) | 1e-5<br>(1e-8;<br>9e-4)  | 1e-5<br>(1e-8;<br>9e-4)    | 1e-5<br>(1e-8;<br>9e-4) | 8e-4<br>(1e-8;<br>9e-4) | 1e-5<br>(1e-8;<br>9e-4)  | 8e-4<br>(1e-8;<br>9e-4)    | 8e-4<br>(1e-8;<br>9e-4) | 9e-4<br>(2e-4;<br>0.001) |
| <b>Feeding Mode</b>     | -42.93<br>(-50.26;<br>-35.12) | 1e-5<br>(1e-8;<br>9e-4)   | 1e-5<br>(1e-8;<br>9e-4)   | 8e-4<br>(1e-8;<br>9e-4) | 1e-5<br>(1e-8;<br>9e-4) | 1e-5<br>(1e-8;<br>9e-4)  | 1e-5<br>(1e-8;<br>9e-4)    | 8e-4<br>(1e-8;<br>9e-4) | 8e-4<br>(1e-8;<br>9e-4) | 1e-5<br>(1e-8;<br>9e-4)  | 8e-4<br>(1e-8;<br>9e-4)    | 9e-4<br>(3e-4;<br>9e-4) | 8e-4<br>(1e-8;<br>9e-4)  |
| <b>Feeding Habitat</b>  | -46.13<br>(-52.53;<br>-39.84) | 5e-4<br>(1e-8;<br>9e-4)   | 3e-4<br>(1e-8;<br>9e-4)   | 8e-4<br>(7e-5;<br>9e-4) | -                       | 9e-5<br>(1e-8;<br>8e-4)  | 8e-4<br>(1e-4;<br>0.001)   | 8e-4<br>(1e-4;<br>9e-4) | -                       | 9e-5<br>(1e-8;<br>9e-4)  | 7e-4<br>(5e-5;<br>9e-4)    | 8e-4<br>(8e-5;<br>9e-4) | -                        |
| <b>Tooth Morphology</b> | -11.71<br>(-16.71;<br>-8.44)  | 1e-4<br>(6e-6;<br>9e-4)   | 7e-4<br>(7e-5;<br>9e-4)   | -                       | -                       | 3e-4<br>(1e-5;<br>9e-4)  | 8e-4<br>(6e-5;<br>9e-4)    | -                       | -                       | 8e-4<br>(1e-4;<br>0.001) | 2e-4<br>(6e-6;<br>9e-4)    | -                       | -                        |
| <b>Alimentary tract</b> | -10.15<br>(-13.62;<br>-5.64)  | 5e-4<br>(6e-5;<br>9e-4)   | -                         | -                       | -                       | 7e-4<br>(1e-4;<br>0.001) | -                          | -                       | -                       | -                        | -                          | -                       | -                        |
| <b>Schooling</b>        | -48.26<br>(-56.40;<br>-41.87) | 0.008<br>(9e-4;<br>0.009) | 0.005<br>(1e-4;<br>0.009) | -                       | -                       | 7e-4<br>(1e-6;<br>0.005) | 0.008<br>(0.001;<br>0.009) | -                       | -                       | 8e-8<br>(1e-6;<br>0.007) | 0.009<br>(0.003;<br>0.009) | -                       | -                        |

Supplementary table 11. Continuation.

| Traits                  | q30                     | q31                      | q32                     | q34                     | q40                     | q41                      | q42                     | q43                     | #Br          | #Nd         |
|-------------------------|-------------------------|--------------------------|-------------------------|-------------------------|-------------------------|--------------------------|-------------------------|-------------------------|--------------|-------------|
| <b>Diet</b>             | 8e-4<br>(1e-8;<br>9e-4) | 1e-5<br>(1e-8;<br>9e-4)  | 1e-5<br>(1e-8;<br>9e-4) | 8e-4<br>(1e-8;<br>9e-4) | 1e-5<br>(1e-8;<br>9e-4) | 8e-4<br>(3e-4;<br>0.001) | 1e-5<br>(0; 9e-4)       | 1e-5<br>(1e-8;<br>9e-4) | 7<br>(1; 10) | 4<br>(2; 7) |
| <b>Feeding Mode</b>     | 8e-4<br>(3e-4;<br>9e-4) | 1e-5<br>(1e-8;<br>9e-4)  | 1e-5<br>(1e-8;<br>9e-4) | 1e-5<br>(1e-8;<br>9e-4) | 1e-5<br>(1e-8;<br>9e-4) | 8e-4<br>(1e-8;<br>9e-4)  | 1e-5<br>(1e-8;<br>9e-4) | 8e-4<br>(1e-8;<br>9e-4) | 5<br>(2; 11) | 4<br>(2; 8) |
| <b>Feeding Habitat</b>  | 2e-4<br>(2e-6;<br>9e-4) | 9e-4<br>(4e-4;<br>0.001) | 1e-4<br>(7e-6;<br>9e-4) | -                       | -                       | -                        | -                       | -                       | 6<br>(1; 10) | 4<br>(2; 7) |
| <b>Tooth Morphology</b> | -                       | -                        | -                       | -                       | -                       | -                        | -                       | -                       | 5<br>(1; 10) | 3<br>(1; 6) |
| <b>Alimentary tract</b> | -                       | -                        | -                       | -                       | -                       | -                        | -                       | -                       | 5<br>(2; 10) | 3<br>(0; 6) |
| <b>Schooling</b>        | -                       | -                        | -                       | -                       | -                       | -                        | -                       | -                       | 5<br>(2; 11) | 5<br>(2; 8) |

**Supplementary table 12.** Summary of BayesTraits model results for discrete traits for Scarini. Posterior Modal values (lower; upper - Highest Density Interval) of Lh: likelihood; q: transition rates between states; #Br: number of branch lengths scaled using variable rates; #Nd: number of nodes scaled using variable rates. Trait states: Diet (0 - EAM; 1 - EAM+Coral; 2 - EAM+Macroalgae; 3 - EAM+Macroalgae+Sponges; 4 - Macroalgae Seagrass+Macroalgae); Feeding Mode (0 - Browser; 1 - Excavator; 2 - Scraper); Feeding Habitat (0 - off reef; 1 - reef-open; 2 - reef-sand); Tooth morphology (0 - Fused-crenellated; 1 - Fused-even; 2 - Not-fused; 3 - Weakly-fused); Schooling behaviour (0 - Schooling; 1 - Solitary).

| Traits                  | Lh                            | q01                       | q02                       | q03                       | q04                       | q05                       | q10                       | q12                       | q13                       | q14                       | q15                       | q20                       | q21                       | q23                        | q24                       | q25                       |
|-------------------------|-------------------------------|---------------------------|---------------------------|---------------------------|---------------------------|---------------------------|---------------------------|---------------------------|---------------------------|---------------------------|---------------------------|---------------------------|---------------------------|----------------------------|---------------------------|---------------------------|
| <b>Diet</b>             | -35.19<br>(-40.93;<br>-30.20) | 6e-04<br>(1e-8;<br>0.009) | 2e-04<br>(1e-8;<br>0.008) | 1e-04<br>(1e-8;<br>0.008) | 1e-04<br>(1e-8;<br>0.008) | 3e-04<br>(1e-8;<br>0.009) | 3e-04<br>(1e-8;<br>0.009) | 4e-04<br>(1e-8;<br>0.009) | 4e-04<br>(1e-8;<br>0.009) | 3e-04<br>(1e-8;<br>0.009) | 4e-04<br>(1e-8;<br>0.009) | 2e-04<br>(1e-8;<br>0.009) | 5e-04<br>(1e-8;<br>0.009) | 1e-04<br>(1e-8;<br>0.009)  | 2e-04<br>(1e-8;<br>0.009) | 5e-04<br>(1e-8;<br>0.009) |
| <b>Feeding Mode</b>     | -22.08<br>(-27.66;<br>-18.12) | 0.006<br>(5e-5;<br>0.06)  | 0.008<br>(5e-5;<br>0.07)  | -                         | -                         | -                         | 0.01<br>(2e-5;<br>0.09)   | 0.07<br>(0.002;<br>0.09)  | -                         | -                         | -                         | 0.006<br>(4e-6;<br>0.06)  | 0.01<br>(9e-5;<br>0.07)   | -                          | -                         | -                         |
| <b>Feeding Habitat</b>  | -35.02<br>(-39.19;<br>-31.72) | 0.08<br>(0.01;<br>0.09)   | 0.01<br>(0.003;<br>0.09)  | -                         | -                         | -                         | 0.001<br>(1e-6;<br>0.01)  | 0.01<br>(0.002;<br>0.03)  | -                         | -                         | -                         | 0.01<br>(0.002;<br>0.09)  | 0.09<br>(0.02;<br>0.09)   | -                          | -                         | -                         |
| <b>Tooth Morphology</b> | -22.44<br>(-26.21;<br>-18.56) | 0.005<br>(1e-4;<br>0.009) | 0.002<br>(1e-5;<br>0.009) | 0.001<br>(1e-5;<br>0.009) | -                         | -                         | 0.003<br>(8e-6;<br>0.009) | 9e-4<br>(5e-6;<br>0.008)  | 8e-4<br>(8e-6;<br>0.008)  | -                         | -                         | 0.007<br>(9e-6;<br>0.009) | 0.002<br>(1e-4;<br>0.009) | 0.008<br>(0.001;<br>0.009) | -                         | -                         |
| <b>Schooling</b>        | -52.48<br>(-55.78;<br>-47.87) | 0.03<br>(0.01;<br>0.14)   | -                         | -                         | -                         | -                         | 0.04<br>(0.02;<br>0.19)   | -                         | -                         | -                         | -                         | -                         | -                         | -                          | -                         | -                         |

**Supplementary table 12.** Continuation.

| <b>Traits</b>           | <b>q30</b>                 | <b>q31</b>                | <b>q32</b>                | <b>q34</b>                | <b>q35</b>                | <b>q40</b>                | <b>q41</b>                | <b>q42</b>                | <b>q43</b>                | <b>q45</b>                | <b>q50</b>                | <b>q51</b>                | <b>q52</b>                | <b>q53</b>                | <b>q54</b>                | <b>#Br</b>   | <b>#Nd</b>  |
|-------------------------|----------------------------|---------------------------|---------------------------|---------------------------|---------------------------|---------------------------|---------------------------|---------------------------|---------------------------|---------------------------|---------------------------|---------------------------|---------------------------|---------------------------|---------------------------|--------------|-------------|
| <b>Diet</b>             | 3e-04<br>(1e-8;<br>0.009)  | 4e-04<br>(1e-8;<br>0.009) | 5e-04<br>(1e-8;<br>0.009) | 3e-04<br>(1e-8;<br>0.009) | 4e-04<br>(1e-8;<br>0.009) | 2e-04<br>(1e-8;<br>0.009) | 3e-04<br>(1e-8;<br>0.009) | 3e-04<br>(1e-8;<br>0.009) | 3e-04<br>(1e-8;<br>0.009) | 0.008<br>(1e-8;<br>0.009) | 2e-04<br>(1e-8;<br>0.009) | 2e-04<br>(1e-8;<br>0.009) | 4e-04<br>(1e-8;<br>0.009) | 2e-04<br>(1e-8;<br>0.009) | 9e-04<br>(1e-8;<br>0.009) | 8<br>(2; 12) | 3<br>(1; 7) |
| <b>Feeding Mode</b>     | -                          | -                         | -                         | -                         | -                         | -                         | -                         | -                         | -                         | -                         | -                         | -                         | -                         | -                         | -                         | 6<br>(1; 11) | 3<br>(1; 6) |
| <b>Feeding Habitat</b>  | -                          | -                         | -                         | -                         | -                         | -                         | -                         | -                         | -                         | -                         | -                         | -                         | -                         | -                         | -                         | 7<br>(2; 12) | 3<br>(0; 6) |
| <b>Tooth Morphology</b> | 0.006<br>(0.001;<br>0.009) | 0.001<br>(2e-5;<br>0.009) | 0.006<br>(5e-4;<br>0.009) | -                         | -                         | -                         | -                         | -                         | -                         | -                         | -                         | -                         | -                         | -                         | -                         | 7<br>(2; 12) | 2<br>(0; 5) |
| <b>Schooling</b>        | -                          | -                         | -                         | -                         | -                         | -                         | -                         | -                         | -                         | -                         | -                         | -                         | -                         | -                         | -                         | 7<br>(2; 12) | 4<br>(1; 7) |

**Supplementary table 13.** Summary of BayesTraits model results for the continuous trait (maximum length). Posterior Modal values (lower; upper - Highest Density Interval) of Lh: likelihood; Alpha: phylogenetic mean of the trait; Sigma: Brownian motion variance for the trait; #Br: number of branch lengths scaled using variable rates; #Nd: number of nodes scaled using variable rates.

| <b>Taxa</b>         | <b>Lh</b>                        | <b>Alpha</b>               | <b>Sigma</b>               | <b>#Br</b>   | <b>#Nd</b>  |
|---------------------|----------------------------------|----------------------------|----------------------------|--------------|-------------|
| <b>Siganidae</b>    | -85.83<br>(-89.84;<br>-82.91)    | 34.44<br>(28.86;<br>40.85) | 89.37<br>(18.78;<br>99.97) | 2<br>(0; 4)  | 0<br>(0; 2) |
| <b>Acanthuridae</b> | -279.42<br>(-290.64;<br>-268.81) | 36.54<br>(26.82;<br>63.32) | 87.22<br>(15.24;<br>99.97) | 7<br>(3; 12) | 3<br>(0; 6) |
| <b>Scarini</b>      | -366.91<br>(-373.74;<br>-356.92) | 44.95<br>(15.46;<br>80.45) | 29.76<br>(14.20;<br>47.13) | 7<br>(3; 12) | 4<br>(1; 7) |



**Supplementary table 14.** Summary of BayesTraits model results for ecosystem functions. Posterior Modal values (lower; upper - Highest Density Interval) of Lh: likelihood; q: transition rates between states; #Br: number of branch lengths scaled using variable rates; #Nd: number of nodes scaled using variable rates. States: Siganidae (0 - Macroalgae removal; 1 - Turf removal; 2 - Turf removal + Crevice cleaning; 3 - Turf removal + Crevice cleaning+Spongivory; 4 - Turf + Sediment removal); Acanthuridae (0 - Macroalgae removal; 1 - Sediment removal; 2 - Turf removal; 3 - Turf removal + Crevice cleaning; 4 - Turf + Sediment removal; 5 - Zooplanktivory; 6 - Zooplanktivory + Turf removal); Scarini (0 - Macroalgae removal; 1 - Macroalgae + Turf+Sediment removal; 2 - Macroalgae + Turf+Sediment removal + Spongivory; 3 - Turf + Sediment removal; 4 - Turf + Sediment removal + Bioerosion; 5 - Turf + Sediment removal + Bioerosion + Corallivory).

| Taxa                | Lh                            | q01                       | q02                       | q03                       | q04                       | q05                       | q06                       | q10                       | q12                       | q13                       | q14                       | q15                       | q16                       | q20                       | q21                       | q23                       | q24                       | q25                       |                          |
|---------------------|-------------------------------|---------------------------|---------------------------|---------------------------|---------------------------|---------------------------|---------------------------|---------------------------|---------------------------|---------------------------|---------------------------|---------------------------|---------------------------|---------------------------|---------------------------|---------------------------|---------------------------|---------------------------|--------------------------|
| <b>Siganidae</b>    | -22.24<br>(-27.39;<br>-18.90) | 0.01<br>(1e-8;<br>0.01)   | 0.01<br>(1e-8;<br>0.01)   | 2e-4<br>(1e-8;<br>0.01)   | 0.01<br>(1e-8;<br>0.01)   | -                         | -                         | 0.01<br>(1e-8;<br>0.01)   | 0.01<br>(1e-8;<br>0.01)   | 2e-4<br>(1e-8;<br>0.01)   | 2e-4<br>(1e-8;<br>0.01)   | -                         | -                         | 0.01<br>(1e-8;<br>0.01)   | 2e-4<br>(1e-8;<br>0.01)   | 0.01<br>(1e-8;<br>0.01)   | 2e-4<br>(1e-8;<br>0.01)   | -                         |                          |
| <b>Acanthuridae</b> | -50.73<br>(-56.92;<br>-44.30) | 0.002<br>(1e-8;<br>0.002) |                          |
| <b>Scarini</b>      | -58.69<br>(-66.58;<br>-49.15) | 0.006<br>(1e-8;<br>0.006) | 2e-4<br>(1e-8;<br>0.006)  | 2e-4<br>(1e-8;<br>0.006)  | 1e-4<br>(1e-8;<br>0.006)  | 2e-4<br>(1e-8;<br>0.006)  | -                         | 3e-4<br>(1e-8;<br>0.006)  | 0.006<br>(1e-8;<br>0.006) | 1e-4<br>(1e-8;<br>0.006)  | 1e-4<br>(1e-8;<br>0.006)  | 3e-4<br>(1e-8;<br>0.006)  | -                         | 1e-4<br>(1e-8;<br>0.006)  | 2e-4<br>(1e-8;<br>0.006)  | 2e-4<br>(1e-8;<br>0.006)  | 2e-4<br>(1e-8;<br>0.006)  | 2e-4<br>(1e-8;<br>0.006)  | 2e-4<br>(1e-8;<br>0.006) |

  

| Traits              | q26                       | q30                       | q31                       | q32                       | q34                       | q35                       | q36                       | q40                       | q41                       | q42                       | q43                       | q45                       | q46                       | q50                       | q51                       | q52                       | q53                       | q54                       |
|---------------------|---------------------------|---------------------------|---------------------------|---------------------------|---------------------------|---------------------------|---------------------------|---------------------------|---------------------------|---------------------------|---------------------------|---------------------------|---------------------------|---------------------------|---------------------------|---------------------------|---------------------------|---------------------------|
| <b>Siganidae</b>    | -                         | 0.01<br>(1e-8;<br>0.01)   | 0.01<br>(1e-8;<br>0.01)   | 2e-4<br>(1e-8;<br>0.01)   | 0.01<br>(1e-8;<br>0.01)   | -                         | -                         | 0.01<br>(1e-8;<br>0.01)   | 3e-4<br>(1e-8;<br>0.01)   | 3e-4<br>(1e-8;<br>0.01)   | 2e-4<br>(1e-8;<br>0.01)   | -                         | -                         | -                         | -                         | -                         | -                         | -                         |
| <b>Acanthuridae</b> | 0.002<br>(1e-8;<br>0.002) |
| <b>Scarini</b>      | -                         | 2e-5<br>(1e-8;<br>0.006)  | 1e-5<br>(1e-8;<br>0.006)  | 2e-5<br>(1e-8;<br>0.006)  | 0.006<br>(1e-8;<br>0.006) | 2e-5<br>(1e-8;<br>0.006)  | -                         | 1e-4<br>(1e-8;<br>0.006)  | 1e-4<br>(1e-8;<br>0.006)  | 1e-4<br>(1e-8;<br>0.006)  | 2e-4<br>(1e-8;<br>0.006)  | 0.006<br>(1e-8;<br>0.006) | -                         | 2e-4<br>(1e-8;<br>0.006)  | 2e-4<br>(1e-8;<br>0.006)  | 2e-4<br>(1e-8;<br>0.006)  | 1e-4<br>(1e-8;<br>0.006)  | 3e-4<br>(1e-8;<br>0.006)  |

Supplementary table 14. Continuation.

| Traits              | q56                       | q60                       | q61                       | q62                       | q63                       | q64                       | q65                       | #Br          | #Nd         |
|---------------------|---------------------------|---------------------------|---------------------------|---------------------------|---------------------------|---------------------------|---------------------------|--------------|-------------|
| <b>Siganidae</b>    | -                         | -                         | -                         | -                         | -                         | -                         | -                         | 1<br>(0; 5)  | 1<br>(0; 3) |
| <b>Acanthuridae</b> | 0.002<br>(1e-8;<br>0.002) | 5<br>(2; 11) | 3<br>(0; 5) |
| <b>Scarini</b>      | -                         | -                         | -                         | -                         | -                         | -                         | -                         | 7<br>(3; 12) | 4<br>(1; 7) |
